# Supplementary material for: The favorable routes for the hydrolysis of CH2OO with (H2O)n (n = 1–4) investigated by global minimum searching combined with quantum chemical methods
Source: Royal Society of Chemistry journal article supplement (doi:10.1039/d0cp00028k), 2021-01-01
Supplement: d0cp00028k7.pdf [file d0cp00028k7.pdf]

## The favorable routes for the hydrolysis of CH<sub>2</sub>OO with (H<sub>2</sub>O)<sub>n</sub> (*n* = 1-4) investigated by global minimum searching combined with quantum chemical methods

Rui Wang<sup>a,e</sup>, Mingjie Wen<sup>a,e,#</sup>, Shuai Liu<sup>a,#</sup>, Yousong Lu<sup>b,#</sup>, Makroni Lily<sup>b,#</sup>, Balaganesh Muthiah<sup>d</sup>, Tianlei Zhang<sup>a,e,\*</sup>, Zhiyin Wang<sup>a</sup>, Zhuqing Wang<sup>c,\*</sup>

<sup>a</sup> School of Chemical & Environment Science, Shaanxi University of Technology, Hanzhong, Shaanxi 723001, P. R. China

<sup>b</sup> Key Laboratory for Macromolecular Science of Shaanxi Province, School of Chemistry & Chemical Engineering, Shaanxi Normal University, Xi'an, Shaanxi 710062, P. R. China

<sup>c</sup> School of Chemical Engineering, Sichuan University of Science & Engineering, Zigong, 643000, P. R. China

<sup>d</sup> Department of Chemistry, National Taiwan University, Taipei 106, Taiwan

<sup>e</sup> Shanghai Key Laboratory of Molecular Catalysis and Innovative Materials, Fudan University, Shanghai 200433, P. R. China

| S. NO | Caption                                                                                                                                                                                                                                                                                                                                                                                                                                                                              |
|-------|--------------------------------------------------------------------------------------------------------------------------------------------------------------------------------------------------------------------------------------------------------------------------------------------------------------------------------------------------------------------------------------------------------------------------------------------------------------------------------------|
| 3     | <b>Fig. S1</b> Optimized geometries and the binding energy for the complexes of (H <sub>2</sub> O) <sub>n</sub> ( <i>n</i> = 1-4) at the CCSD(T)-F12a/cc-pVDZ-F12//B3LYP/6-311+G(2 <i>d</i> ,2 <i>p</i> ) level of theory (in kcal·mol <sup>-1</sup> ) (Bond distances in Angstroms and angles in degrees)                                                                                                                                                                           |
| 4     | <b>Table S1</b> Zero point energies (ZPE/(kcal·mol <sup>-1</sup> )), relative energies (Δ <i>E</i> and Δ( <i>E</i> +ZPE)/(kcal·mol <sup>-1</sup> )), enthalpies (Δ <i>H</i> (298K)/(kcal·mol <sup>-1</sup> )), entropy (S(298)/(cal·mol <sup>-1</sup> ·K <sup>-1</sup> )) and free energies (Δ <i>G</i> (298K)/(kcal·mol <sup>-1</sup> )) for the (H <sub>2</sub> O) <sub>n</sub> ( <i>n</i> = 2-4) <sup>a</sup>                                                                     |
| 5     | <b>Fig. S2</b> The most stable geometry and the binding energy of CH <sub>2</sub> OO⋯(H <sub>2</sub> O) <sub>2</sub> complexes searched by ABCcluster program (in kcal·mol <sup>-1</sup> ) (Bond distances in Angstroms and angles in degrees)                                                                                                                                                                                                                                       |
| 6     | <b>Fig. S3</b> The geometrical possible structures and the binding energy for the CH <sub>2</sub> OO⋯(H <sub>2</sub> O) <sub>n</sub> ( <i>n</i> = 1-4) complexes at the CCSD(T)-F12a/cc-pVDZ-F12//B3LYP/6-311+G(2 <i>d</i> ,2 <i>p</i> ) level of theory (in kcal·mol <sup>-1</sup> ) (Bond distances in Angstroms and angles in degrees)                                                                                                                                            |
| 7-8   | <b>Table S2</b> Zero point energy (ZPE(298K)/(kcal·mol <sup>-1</sup> )), relative energies (Δ <i>E</i> (298K) and Δ( <i>E</i> + ZPE)(298K)/(kcal·mol <sup>-1</sup> )), enthalpies (Δ <i>H</i> (298K)/(kcal·mol <sup>-1</sup> )), entropy (S/(cal·mol <sup>-1</sup> ·K <sup>-1</sup> )) and free energies (Δ <i>G</i> (298K)/(kcal·mol <sup>-1</sup> )) for the reactant complexes of CH <sub>2</sub> OO⋯(H <sub>2</sub> O) <sub>n</sub> ( <i>n</i> = 1-4) <sup>a</sup>               |
| 9     | <b>Table S3</b> Zero point energy (ZPE(298K)/(kcal·mol <sup>-1</sup> )), relative energies (Δ <i>E</i> (298K) and Δ( <i>E</i> + ZPE)(298K)/(kcal·mol <sup>-1</sup> )), enthalpies (Δ <i>H</i> (298K)/(kcal·mol <sup>-1</sup> )), entropy (S/(cal·mol <sup>-1</sup> ·K <sup>-1</sup> )), and free energies (Δ <i>G</i> (298K)/(kcal·mol <sup>-1</sup> )) for the favorable routes of the CH <sub>2</sub> OO + (H <sub>2</sub> O) <sub>n</sub> ( <i>n</i> = 1-4) reaction <sup>a</sup> |
| 10    | <b>Fig. S4</b> Schematic energy diagrams for the unfavorable routes of the CH <sub>2</sub> OO + (H <sub>2</sub> O) <sub>2</sub> reaction at the CCSD(T)-F12a/cc-pVDZ-F12//B3LYP/6-311+G(2 <i>d</i> ,2 <i>p</i> ) level                                                                                                                                                                                                                                                               |
| 11    | <b>Fig. S5</b> Schematic energy diagrams for the unfavorable routes of the CH <sub>2</sub> OO + (H <sub>2</sub> O) <sub>3</sub> reaction at the CCSD(T)-F12a/cc-pVDZ-F12//B3LYP/6-311+G(2 <i>d</i> ,2 <i>p</i> ) level                                                                                                                                                                                                                                                               |

\* Corresponding authors. Tel: +86-0916-2641083, Fax: +86-0916-2641083.

E-mail: ztianlei88@163.com (T.L. Zhang); wangzq128@163.com (Z.Q. Wang).

# These authors are contributed equally to this work.

† Electronic supplementary information (ESI) available.

|       |                                                                                                                                                                                                                                                                                                                                                                                                                                                                                                                                         |
|-------|-----------------------------------------------------------------------------------------------------------------------------------------------------------------------------------------------------------------------------------------------------------------------------------------------------------------------------------------------------------------------------------------------------------------------------------------------------------------------------------------------------------------------------------------|
| 12    | <b>Fig. S6</b> Schematic energy diagrams for the unfavorable routes of the $\text{CH}_2\text{OO} + (\text{H}_2\text{O})_4$ reaction at the CCSD(T)-F12a/cc-pVDZ-F12//B3LYP/6-311+G(2d,2p) level                                                                                                                                                                                                                                                                                                                                         |
| 13-14 | <b>Fig. S7</b> The trajectories of BOMD simulation combined with NVT ensemble for the favorable channels of the gas phase hydrolysis reaction of $\text{CH}_2\text{OO}$ with $(\text{H}_2\text{O})_n$ ( $n = 1-3$ )                                                                                                                                                                                                                                                                                                                     |
| 15-16 | <b>Fig. S8</b> The trajectories of BOMD simulation combined with NVE ensemble for the favorable channels of the gas phase hydrolysis reaction of $\text{CH}_2\text{OO}$ with $(\text{H}_2\text{O})_n$ ( $n = 1-3$ )                                                                                                                                                                                                                                                                                                                     |
| 17    | <b>Fig. S9</b> Schematic energy diagrams for the favorable channels of the $\text{CH}_2\text{OO} + (\text{H}_2\text{O})_n$ ( $n = 2-4$ ) reactions starting from geometric isomers of $\text{CH}_2\text{OO}\cdots(\text{H}_2\text{O})_n$ ( $n = 2-4$ ) complexes at the CCSD(T)-F12a/cc-pVDZ-F12//B3LYP/6-311+G(2d,2p) level                                                                                                                                                                                                            |
| 18-19 | <b>Table S4</b> Rate constants ( $\text{cm}^3\cdot\text{molecules}^{-1}\cdot\text{s}^{-1}$ ) for the $\text{CH}_2\text{OO} + (\text{H}_2\text{O})_n$ ( $n = 1-4$ ) reaction within the temperature range of 290-320 K                                                                                                                                                                                                                                                                                                                   |
| 20    | <b>Table S5</b> The high-pressure canonical rate constant $k_{\text{total}}$ ( $\text{cm}^3\cdot\text{molecule}^{-1}\cdot\text{s}^{-1}$ ) and the calculated branching ratio ( $\beta$ ) $k_{-1}$ (pre-reactive complex $\text{IM\_WD1a}_1 \rightarrow$ reactants $\text{CH}_2\text{OO} + (\text{H}_2\text{O})_2$ ) and $k_2$ (pre-reactive complex $\text{IM\_WD1a}_1 \rightarrow$ transition state $\text{TS\_WD1a}_1 \rightarrow$ products $\text{HOCH}_2\text{OO} + \text{H}_2\text{O}$ ) within the temperature range of 213-320 K |
| 21    | <b>Table S6</b> Rate constants ( $\text{cm}^3\cdot\text{molecules}^{-1}\cdot\text{s}^{-1}$ ) of hydrogen atoms isomerization with the favorable routes for the $\text{CH}_2\text{OO} + (\text{H}_2\text{O})_n$ ( $n = 2-4$ ) reaction within the temperature range of 290-320 K <sup>a</sup>                                                                                                                                                                                                                                            |
| 22    | <b>Table S7</b> Rate constants ( $\text{cm}^3\cdot\text{molecules}^{-1}\cdot\text{s}^{-1}$ ) and rate ratio for the unfavorable routes of the $\text{CH}_2\text{OO} + (\text{H}_2\text{O})_n$ ( $n = 2-4$ ) reaction within the temperature range of 290-320 K <sup>a</sup>                                                                                                                                                                                                                                                             |
| 23    | <b>Table S8</b> Calculated concentration of water clusters (in $\text{molecule}\cdot\text{cm}^{-3}$ ) within the temperature range of 290-320 K at different relative humidity (RH) at the ground level of the Earth's atmosphere <sup>a</sup>                                                                                                                                                                                                                                                                                          |
| 24    | <b>Table S9</b> The relative rate for the hydrolysis of $\text{CH}_2\text{OO}$ with $(\text{H}_2\text{O})_n$ ( $n = 1-4$ ) at different relative humidity (RH) <sup>a</sup>                                                                                                                                                                                                                                                                                                                                                             |
| 25    | <b>Table S10</b> Rate ratios of $\nu_{\text{WMI}}/\nu_{\text{total}}$ , $\nu_{\text{WD1}}/\nu_{\text{total}}$ , $\nu_{\text{WT1}}/\nu_{\text{total}}$ and $\nu_{\text{WQ1}}/\nu_{\text{total}}$ within the temperature range of 290-320 K at different relative humidity (RH) <sup>a</sup>                                                                                                                                                                                                                                              |
| 26-29 | <b>Table S11</b> Coordinates and geometrical structures for the stationary points in the favorable hydrolysis of $\text{CH}_2\text{OO}$ with $(\text{H}_2\text{O})_n$ ( $n = 1-4$ ) reaction at the B3LYP/6-311+G(2d,2p) level                                                                                                                                                                                                                                                                                                          |

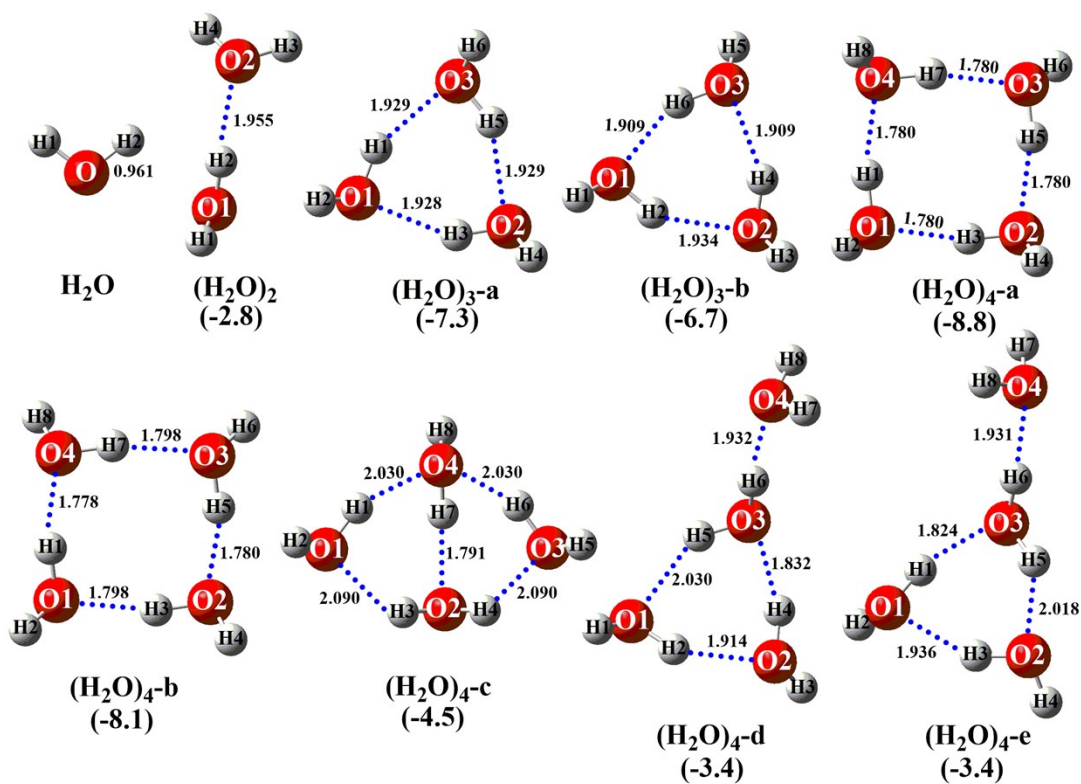

**Fig. S1** Optimized geometries and the binding energy for the complexes of  $(\text{H}_2\text{O})_n$  ( $n = 1-4$ ) at the CCSD(T)-F12a/cc-pVDZ-F12//B3LYP/6-311+G(2d,2p) level of theory (in  $\text{kcal}\cdot\text{mol}^{-1}$ ) (Bond distances in Angstroms and angles in degrees)

**Table S1** Zero point energies (ZPE/(kcal·mol<sup>-1</sup>)), relative energies ( $\Delta E$  and  $\Delta(E+ZPE)$ / (kcal·mol<sup>-1</sup>)), enthalpies ( $\Delta H(298K)$ /(kcal·mol<sup>-1</sup>)), entropy (S(298)/(cal·mol<sup>-1</sup>·K<sup>-1</sup>)), and free energies ( $\Delta G(298K)$ /(kcal·mol<sup>-1</sup>)) for the (H<sub>2</sub>O)<sub>n</sub> (n = 2-4)<sup>a</sup>

| Species                                                           | ZPE  | $\Delta E$                 | $\Delta G$               | S     | $\Delta(E + ZPE)$        | $\Delta H$               |
|-------------------------------------------------------------------|------|----------------------------|--------------------------|-------|--------------------------|--------------------------|
| H <sub>2</sub> O + H <sub>2</sub> O                               | 26.8 | 0.0                        | 0.0                      | 90.2  | 0.0                      | 0.0                      |
| (H <sub>2</sub> O) <sub>2</sub>                                   | 29.1 | -5.0 (-5.0) <sup>b</sup>   | 2.9 (2.6) <sup>b</sup>   | 69.2  | -2.8 (-2.9) <sup>b</sup> | -3.3 (-3.3) <sup>b</sup> |
| H <sub>2</sub> O + (H <sub>2</sub> O) <sub>2</sub>                | 42.5 | 0.0                        | 0.0                      | 114.3 | 0.0                      | 0.0                      |
| (H <sub>2</sub> O) <sub>3</sub> -a                                | 45.8 | -10.6 (-10.9) <sup>b</sup> | 1.8 (1.3) <sup>b</sup>   | 79.3  | -7.3 (-7.6) <sup>b</sup> | -8.6 (-8.8) <sup>b</sup> |
| (H <sub>2</sub> O) <sub>3</sub> -b                                | 45.6 | -9.8 (-10.1) <sup>b</sup>  | 2.2 (1.2) <sup>b</sup>   | 80.4  | -6.7 (-7.2) <sup>b</sup> | -7.9 (-8.1) <sup>b</sup> |
| H <sub>2</sub> O + (H <sub>2</sub> O) <sub>3</sub>                | 59.3 | 0.0                        | 0.0                      | 124.4 | 0.0                      | 0.0                      |
| (H <sub>2</sub> O) <sub>2</sub> + (H <sub>2</sub> O) <sub>2</sub> | 58.1 | 5.6 (5.8) <sup>b</sup>     | 1.1 (0.1) <sup>b</sup>   | 138.5 | 4.5 (4.1) <sup>b</sup>   | 5.3 (5.17) <sup>b</sup>  |
| (H <sub>2</sub> O) <sub>4</sub> -a                                | 62.1 | -11.7 (-11.7) <sup>b</sup> | -0.1 (-0.4) <sup>b</sup> | 91.9  | -8.8 (-8.8) <sup>b</sup> | -9.8 (-9.7) <sup>b</sup> |
| (H <sub>2</sub> O) <sub>4</sub> -b                                | 61.9 | -10.8 (-10.8) <sup>b</sup> | 0.4 (0.2) <sup>b</sup>   | 93.0  | -8.1 (-8.1) <sup>b</sup> | -9.0 (-8.9) <sup>b</sup> |
| (H <sub>2</sub> O) <sub>4</sub> -c                                | 61.5 | -6.7                       | 3.5                      | 95.8  | -4.5                     | -5.0                     |
| (H <sub>2</sub> O) <sub>4</sub> -d                                | 61.0 | -5.2 (-5.2) <sup>b</sup>   | 3.3 (2.9) <sup>b</sup>   | 101.5 | -3.4 (-3.3) <sup>b</sup> | -3.5 (-3.4) <sup>b</sup> |
| (H <sub>2</sub> O) <sub>4</sub> -e                                | 60.9 | -5.1                       | 2.8                      | 103.5 | -3.4                     | -3.5                     |

<sup>a</sup> ZPE and S values obtained at B3LYP/6-311+G(2d,2p) level of theory; The energy values are obtained at CCSD(T)-F12a/cc-pVDZ-F12//B3LYP/6-311+G(2d,2p) level whereas the *H* and *G* corrections are taken from the B3LYP/6-311+G(2d,2p) level;

<sup>b</sup> The values in parentheses are the previously report from reference (*J. Phys. Chem. A*, 2013, 117, 10381-10396).

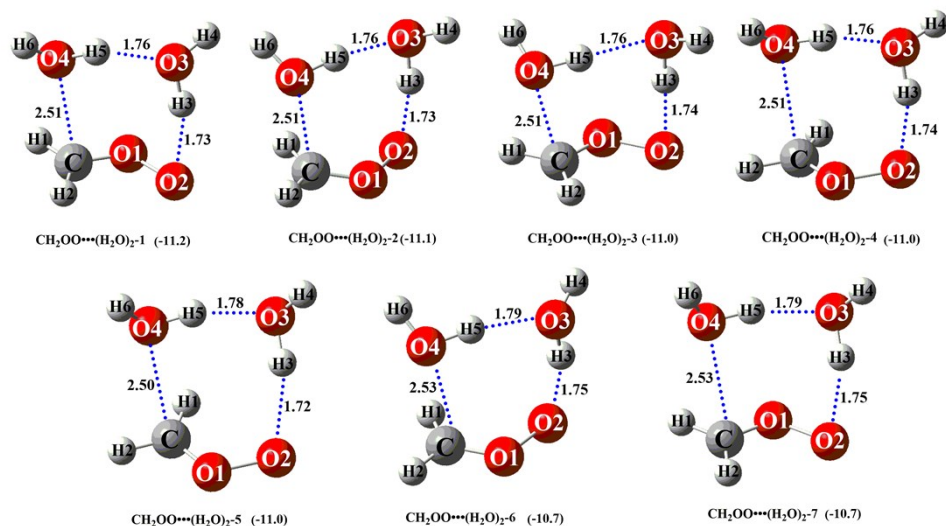

**Fig. S2** The most stable geometry and the binding energy of  $\text{CH}_2\text{OO}\cdots(\text{H}_2\text{O})_2$  complexes searched by ABCluster program (in  $\text{kcal}\cdot\text{mol}^{-1}$ ) (Bond distances in Angstroms and angles in degrees)

In order to verify the accuracy of the stable complexes searched by the TGMin program, the similar cluster searching program named ABCluster program<sup>1,2</sup> has been adopted to verify the stable complexes again. The calculated results show that the obtained stable complexes by ABCluster program is highly agreeable consistent with our results (Fig. S2). So, global minimum searching using Tsinghua Global Minimum program has been introduced to find the most stable geometry of  $\text{CH}_2\text{OO}\cdots(\text{H}_2\text{O})_n$  ( $n = 1-4$ ) complex in the present work.

## Reference

1. J. Zhang and M. Dolg, *Phys. Chem. Chem. Phys.* 2016, **18**, 3003-3010.
2. J. Zhang and M. Dolg, *Phys. Chem. Chem. Phys.* 2015, **17**, 24173-24181.

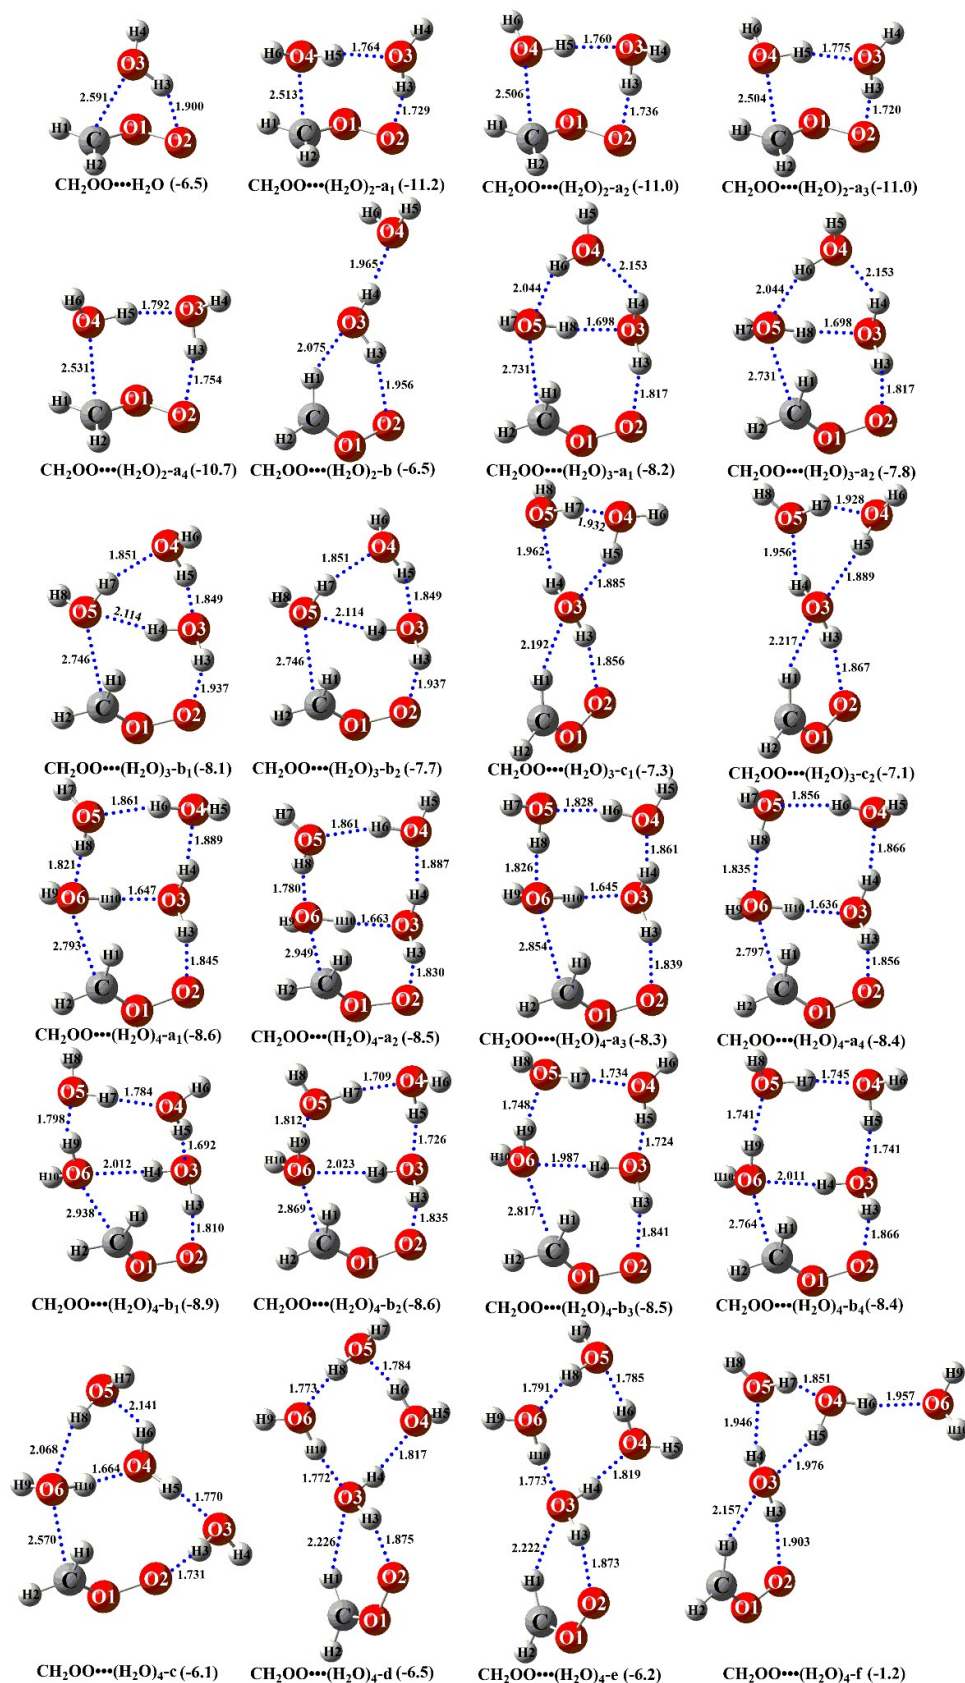

**Fig. S3** The geometrical possible structures and the binding energy for the  $\text{CH}_2\text{OO}\cdots(\text{H}_2\text{O})_n$  ( $n = 1-4$ ) complexes at the CCSD(T)-F12a/cc-pVDZ-F12//B3LYP/6-311+G(2d,2p) level of theory (in  $\text{kcal}\cdot\text{mol}^{-1}$ ) (Bond distances in Angstroms and angles in degrees)

**Table S2** Zero point energy (ZPE(298K)/(kcal·mol<sup>-1</sup>)), relative energies ( $\Delta E(298K)$  and  $\Delta(E + ZPE)(298K)$ /(kcal·mol<sup>-1</sup>)), enthalpies ( $\Delta H(298K)$ /(kcal·mol<sup>-1</sup>)), entropy (S/(cal·mol<sup>-1</sup>·K<sup>-1</sup>)) and free energies ( $\Delta G(298K)$ /(kcal·mol<sup>-1</sup>)) for the reactant complexes of CH<sub>2</sub>OO···(H<sub>2</sub>O)<sub>n</sub> ( $n = 1-4$ )<sup>a</sup>

| Species                                                              | ZPE  | $\Delta E$ | $\Delta G$ | S     | $\Delta(E + ZPE)$ | $\Delta H$ |
|----------------------------------------------------------------------|------|------------|------------|-------|-------------------|------------|
| CH <sub>2</sub> OO + H <sub>2</sub> O                                | 33.0 | 0.0        | 0.0        | 104.6 | 0.0               | 0.0        |
| CH <sub>2</sub> OO···H <sub>2</sub> O                                | 35.0 | -8.6       | 0.9        | 78.1  | -6.5              | -7.0       |
| CH <sub>2</sub> OO + (H <sub>2</sub> O) <sub>2</sub>                 | 48.6 | 0.0        | 0.0        | 128.8 | 0.0               | 0.0        |
| CH <sub>2</sub> OO···(H <sub>2</sub> O) <sub>2</sub> -a <sub>1</sub> | 51.3 | -13.9      | -0.1       | 88.2  | -11.2             | -12.2      |
| CH <sub>2</sub> OO···(H <sub>2</sub> O) <sub>2</sub> -a <sub>2</sub> | 51.3 | -13.7      | 0.0        | 88.5  | -11.0             | -12.0      |
| CH <sub>2</sub> OO···(H <sub>2</sub> O) <sub>2</sub> -a <sub>3</sub> | 51.2 | -13.6      | 0.0        | 89.1  | -11.0             | -11.9      |
| CH <sub>2</sub> OO···(H <sub>2</sub> O) <sub>2</sub> -a <sub>4</sub> | 51.0 | -13.2      | 0.1        | 89.7  | -10.7             | -11.5      |
| CH <sub>2</sub> OO···(H <sub>2</sub> O) <sub>2</sub> -b              | 50.1 | -8.0       | 1.4        | 102.8 | -6.5              | -6.4       |
| CH <sub>2</sub> OO + (H <sub>2</sub> O) <sub>3</sub>                 | 65.1 | 0.0        | 0.0        | 140.0 | 0.0               | 0.0        |
| CH <sub>2</sub> OO···(H <sub>2</sub> O) <sub>3</sub> -a <sub>1</sub> | 67.2 | -10.2      | 2.5        | 102.6 | -8.2              | -8.6       |
| CH <sub>2</sub> OO···(H <sub>2</sub> O) <sub>3</sub> -a <sub>2</sub> | 67.1 | -9.8       | 2.9        | 102.7 | -7.8              | -8.2       |
| CH <sub>2</sub> OO···(H <sub>2</sub> O) <sub>3</sub> -b <sub>1</sub> | 66.9 | -9.9       | 1.9        | 106.0 | -8.1              | -8.2       |
| CH <sub>2</sub> OO···(H <sub>2</sub> O) <sub>3</sub> -b <sub>2</sub> | 67.0 | -9.5       | 2.2        | 106.1 | -7.7              | -7.8       |
| CH <sub>2</sub> OO···(H <sub>2</sub> O) <sub>3</sub> -c <sub>1</sub> | 66.8 | -9.0       | 1.6        | 110.0 | -7.3              | -7.3       |
| CH <sub>2</sub> OO···(H <sub>2</sub> O) <sub>3</sub> -c <sub>2</sub> | 66.8 | -8.8       | 2.0        | 109.7 | -7.1              | -7.1       |
| CH <sub>2</sub> OO + (H <sub>2</sub> O) <sub>4</sub>                 | 81.6 | 0.0        | 0.0        | 151.5 | 0.0               | 0.0        |
| CH <sub>2</sub> OO···(H <sub>2</sub> O) <sub>4</sub> -a <sub>1</sub> | 82.9 | -9.9       | 0.8        | 120.5 | -8.6              | -8.4       |
| CH <sub>2</sub> OO···(H <sub>2</sub> O) <sub>4</sub> -a <sub>2</sub> | 82.8 | -9.7       | 1.2        | 119.8 | -8.5              | -8.3       |
| CH <sub>2</sub> OO···(H <sub>2</sub> O) <sub>4</sub> -a <sub>3</sub> | 83.0 | -9.7       | 1.4        | 119.2 | -8.3              | -8.3       |
| CH <sub>2</sub> OO···(H <sub>2</sub> O) <sub>4</sub> -a <sub>4</sub> | 82.8 | -9.5       | 0.9        | 121.3 | -8.4              | -8.1       |
| CH <sub>2</sub> OO···(H <sub>2</sub> O) <sub>4</sub> -b <sub>1</sub> | 83.0 | -10.3      | 1.5        | 116.9 | -8.9              | -8.8       |
| CH <sub>2</sub> OO···(H <sub>2</sub> O) <sub>4</sub> -b <sub>2</sub> | 83.0 | -10.0      | 1.6        | 117.4 | -8.6              | -8.6       |
| CH <sub>2</sub> OO···(H <sub>2</sub> O) <sub>4</sub> -b <sub>3</sub> | 82.9 | -9.7       | 1.1        | 119.7 | -8.5              | -8.3       |
| CH <sub>2</sub> OO···(H <sub>2</sub> O) <sub>4</sub> -b <sub>4</sub> | 82.8 | -9.6       | 1.1        | 120.5 | -8.4              | -8.2       |
| CH <sub>2</sub> OO···(H <sub>2</sub> O) <sub>4</sub> -c              | 82.8 | -7.3       | 3.7        | 119.4 | -6.1              | -5.9       |
| CH <sub>2</sub> OO···(H <sub>2</sub> O) <sub>4</sub> -d              | 83.0 | -7.9       | 2.4        | 122.5 | -6.5              | -6.3       |
| CH <sub>2</sub> OO···(H <sub>2</sub> O) <sub>4</sub> -e              | 82.9 | -7.5       | 2.5        | 123.3 | -6.2              | -5.9       |
| CH <sub>2</sub> OO···(H <sub>2</sub> O) <sub>4</sub> -f              | 81.9 | -1.5       | 6.3        | 128.1 | -1.2              | -0.7       |

<sup>a</sup> ZPE and S values obtained at B3LYP/6-311+G(2d,2p) level of theory; The energy values are obtained at CCSD(T)-F12a/cc-pVDZ-F12//B3LYP/6-311+G(2d,2p) level whereas the *H* and *G* corrections are taken from the B3LYP/6-311+G(2d,2p) level

Though some isomers shown in Table S2 have positive Gibbs free energy of formation, and thus would not form spontaneously owing to the large entropic penalty.<sup>1,2</sup> However, as seen in references,<sup>3-14</sup> water catalyzed reactions starting from hydrogen bonded complexes between water and reactant remains a major route to estimate the catalytic effect of water on atmospheric reaction in tropospheric conditions.

Reference:

1. S. S. Iyengar, *J. Chem. Phys.*, 2005, **123**, 084310.

2. S. M. Dietrick, A. B. Pacheco, P. Phatak, P. S. Stevens and S. S. Iyengar, *J. Phys. Chem. A*, 2012, **116**, 399-414.
3. W. Chao, J. T. Hsieh and C. H. Chang, *Science*, 2015, **347**, 751-754.
4. C. Zhu, M. Kumar, J. Zhong, L. Li, J. S. Francisco and X. C. Zeng, *J. Am. Chem. Soc.*, 2016, **138**, 11164-11169.
5. T. Berndt, J. Voigtländer, F. Stratmann, H. Junninen, R. L. Mauldin III, M. Sipilä, M. Kulmalab and H. Herrmann, *Phys. Chem. Chem. Phys.*, 2014, **16**, 19130-19136.
6. T. R. Lewis, M. A. Blitz, D. E. Heard and W. Seakins, *Phys. Chem. Chem. Phys.*, 2015, **17**, 4859-4863.
7. L. C. Lin, H. T. Chang, C. H. Chang, W. Chao, M. C. Smith, C. H. Chang, J. J. M. Lin and K. Takahashi, *Phys. Chem. Chem. Phys.*, 2016, **18**, 4557-4568.
8. X. F. Tan, B. Long, D. S. Ren, W. J. Zhang, Z. W. Long and E. Mitchell, *Phys. Chem. Chem. Phys.*, 2018, **20**, 7701-7709.
9. M. C. Smith, C. H. Chang, W. Chao, L. C. Lin, K. Takahashi, K. A. Boering and J. J. M. Lin, *J. Phys. Chem. Lett.*, 2015, **6**, 2708-2713.
10. M. K. Louie, J. S. Francisco, M. Verdicchio, S. J. Klippenstein and A. Sinha, *J. Phys. Chem. A*, 2016, **120**, 1358-1368.
11. B. Bandyopadhyay, P. Kumar and P. Biswas, *J. Phys. Chem. A*, 2017, **121**, 3101-3108.
12. S. Mallick, S. Sarkar, B. Bandyopadhyay and P. Kumar, *J. Phys. Chem. A*, 2018, **122**, 350-363.
13. L. Chen, W. Wang, L. Zhou, W. Wang, F. Liu, C. Li and J. Lü. *Theor. Chem. Acc.*, 2016, **135**, 252.
14. L. Chen, W. Wang, W. Wang, Y. Liu, F. Liu, N. Liu and B. Wang, *Theor. Chem. Acc.*, 2016, **135**, 131.



**Table S3** Zero point energy (ZPE(298K)/(kcal·mol<sup>-1</sup>)), relative energies ( $\Delta E(298K)$  and  $\Delta(E + ZPE)(298K)$ /(kcal·mol<sup>-1</sup>)), enthalpies ( $\Delta H(298K)$ /(kcal·mol<sup>-1</sup>)), entropy (S/(cal·mol<sup>-1</sup>·K<sup>-1</sup>)), and free energies ( $\Delta G(298K)$ /(kcal·mol<sup>-1</sup>)) for the favorable routes of the CH<sub>2</sub>OO + (H<sub>2</sub>O)<sub>*n*</sub> (*n* = 1-4) reaction<sup>a</sup>

| <i>Species</i>                                                       | ZPE  | $\Delta E$ | $\Delta G$ | S     | $\Delta(E + ZPE)$ | $\Delta H$ |
|----------------------------------------------------------------------|------|------------|------------|-------|-------------------|------------|
| CH <sub>2</sub> OO + H <sub>2</sub> O                                | 33.0 | 0.0        | 0.0        | 104.6 | 0.0               | 0.0        |
| CH <sub>2</sub> OO···H <sub>2</sub> O                                | 35.4 | -7.5       | 3.4        | 74.0  | -5.0              | -5.7       |
| TS_WM                                                                | 35.4 | 0.0        | 12.1       | 66.5  | 2.5               | 0.7        |
| HOCH <sub>2</sub> OOH                                                | 38.0 | -47.7      | -33.5      | 69.2  | -42.7             | -44.1      |
| CH <sub>2</sub> OO + (H <sub>2</sub> O) <sub>2</sub>                 | 48.6 | 0.0        | 0.0        | 128.8 | 0.0               | 0.0        |
| CH <sub>2</sub> OO···(H <sub>2</sub> O) <sub>2</sub> -a <sub>1</sub> | 51.3 | -13.9      | -0.1       | 88.2  | -11.2             | -12.2      |
| TS_WD1a <sub>1</sub>                                                 | 51.1 | -9.5       | 5.9        | 77.3  | -7.0              | -9.4       |
| IMF_WD1a <sub>1</sub>                                                | 54.0 | -51.3      | -33.7      | 82.6  | -45.9             | -47.5      |
| HOCH <sub>2</sub> OOH + H <sub>2</sub> O                             | 51.4 | -42.7      | -36.4      | 114.2 | -39.9             | -40.7      |
| CH <sub>2</sub> OO + (H <sub>2</sub> O) <sub>3</sub>                 | 65.1 | 0.0        | 0.0        | 140.0 | 0.0               | 0.0        |
| CH <sub>2</sub> OO···(H <sub>2</sub> O) <sub>3</sub> -a <sub>1</sub> | 67.2 | -10.2      | 2.5        | 102.6 | -8.2              | -8.6       |
| TS_WT1a <sub>1</sub>                                                 | 65.5 | -3.9       | 8.0        | 96.8  | -3.5              | -4.9       |
| IMF_WT1a <sub>1</sub>                                                | 69.8 | -51.0      | -34.8      | 97.9  | -46.3             | -47.3      |
| CH <sub>2</sub> OO···(H <sub>2</sub> O) <sub>3</sub> -b <sub>1</sub> | 66.9 | -9.9       | 1.9        | 106.0 | -8.1              | -8.2       |
| TS_WT2b <sub>1</sub>                                                 | 65.8 | -6.5       | 4.0        | 106.6 | -5.8              | -5.9       |
| IM_WT3b <sub>1</sub>                                                 | 67.0 | -13.2      | -1.0       | 104.0 | -11.4             | -11.8      |
| TS_WT3b <sub>1</sub>                                                 | 66.5 | -8.4       | 5.8        | 90.2  | -7.0              | -9.1       |
| IMF_WT3b <sub>1</sub>                                                | 69.8 | -51.0      | -34.8      | 97.9  | -46.3             | -47.3      |
| HOCH <sub>2</sub> OOH + (H <sub>2</sub> O) <sub>2</sub>              | 67.0 | -37.8      | -35.7      | 138.4 | -36.0             | -36.1      |
| CH <sub>2</sub> OO + (H <sub>2</sub> O) <sub>4</sub>                 | 81.6 | 0.0        | 0.0        | 151.5 | 0.0               | 0.0        |
| CH <sub>2</sub> OO···(H <sub>2</sub> O) <sub>4</sub> -a <sub>1</sub> | 82.9 | -9.9       | 0.8        | 120.5 | -8.6              | -8.4       |
| TS_WQ1a <sub>1</sub>                                                 | 81.6 | -2.4       | 9.6        | 106.9 | -2.4              | -3.7       |
| IMF_WQ1a <sub>1</sub>                                                | 85.4 | -47.1      | -32.8      | 114.8 | -43.4             | -43.8      |
| CH <sub>2</sub> OO···(H <sub>2</sub> O) <sub>4</sub> -b <sub>1</sub> | 83.0 | -10.3      | 1.5        | 116.9 | -8.9              | -8.8       |
| TS_WQ2b <sub>1</sub>                                                 | 82.5 | 1.6        | 13.2       | 113.1 | 2.5               | 1.8        |
| IM_WQ3b <sub>1</sub>                                                 | 82.6 | -9.1       | 1.1        | 121.2 | -8.2              | -7.9       |
| TS_WQ3b <sub>1</sub>                                                 | 79.2 | 6.2        | 16.5       | 100.7 | 3.7               | 1.4        |
| IMF_WQ3b <sub>1</sub>                                                | 85.8 | -49.0      | -33.5      | 110.8 | -44.9             | -45.6      |
| HOCH <sub>2</sub> OOH + (H <sub>2</sub> O) <sub>3</sub>              | 83.6 | -35.2      | -33.0      | 149.6 | -33.3             | -33.6      |

<sup>a</sup> ZPE and S values obtained at B3LYP/6-311+G(2*d*,2*p*) level of theory; The energy values are obtained at the CCSD(T)-F12a/cc-pVDZ-F12//B3LYP/6-311+G(2*d*,2*p*) level whereas the *H* and *G* corrections are taken from the B3LYP/6-311+G(2*d*,2*p*) level

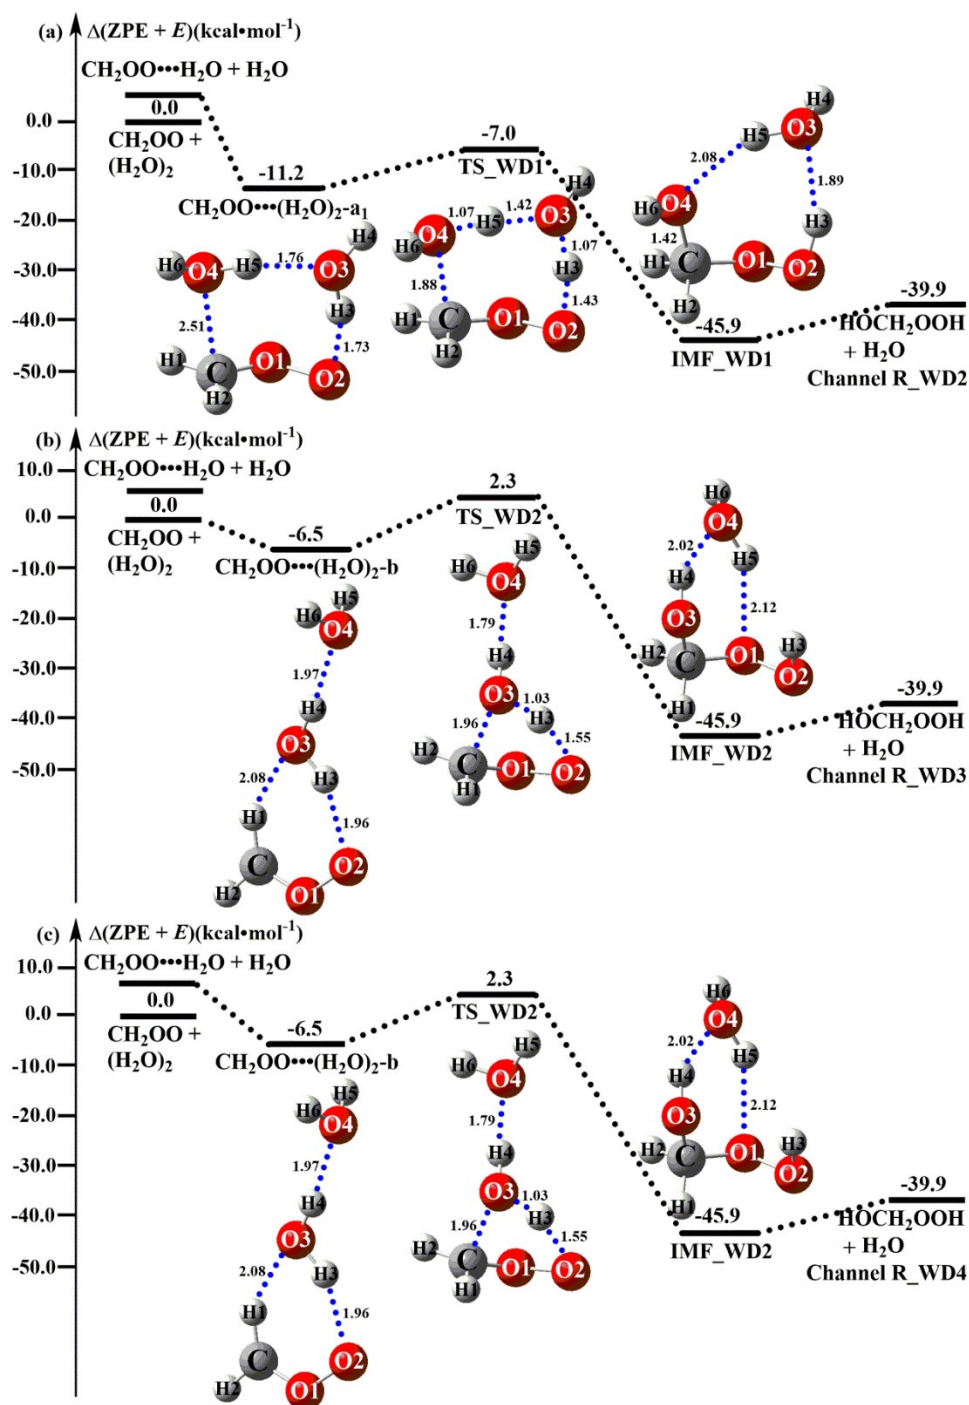

**Fig. S4** Schematic energy diagrams for the unfavorable routes of the  $\text{CH}_2\text{OO} + (\text{H}_2\text{O})_2$  reaction at the CCSD(T)-F12a/cc-pVDZ-F12//B3LYP/6-311+G(2d,2p) level

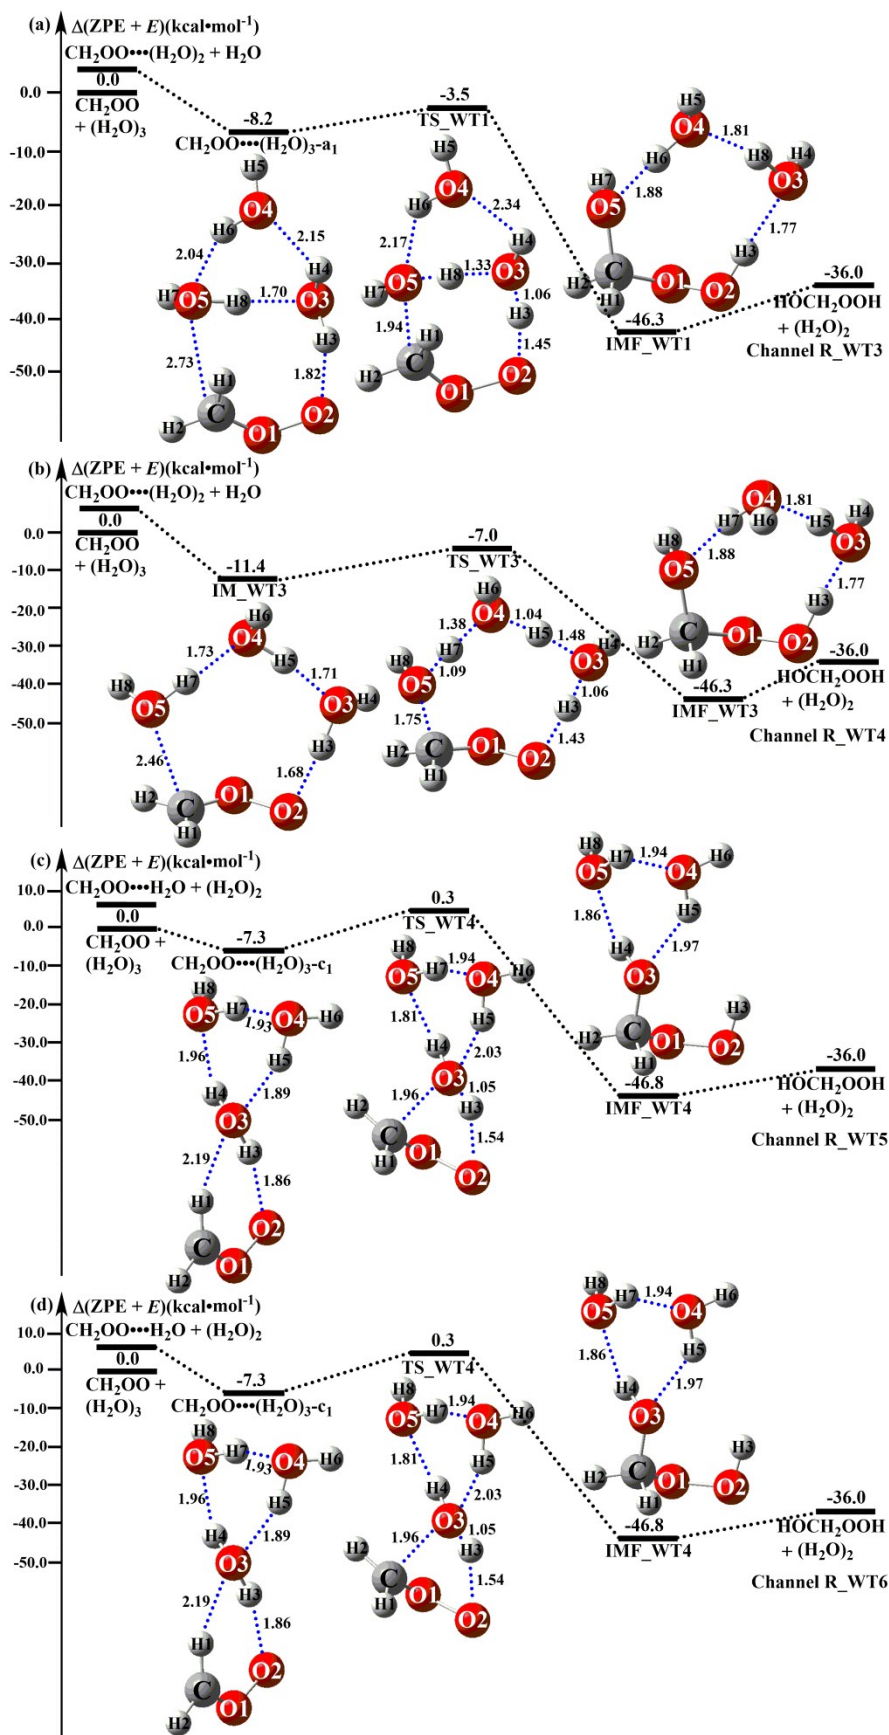

**Fig. S5** Schematic energy diagrams for the unfavorable routes of the  $\text{CH}_2\text{OO} + (\text{H}_2\text{O})_3$  reaction at the CCSD(T)-F12a/cc-pVDZ-F12//B3LYP/6-311+G(2d,2p) level

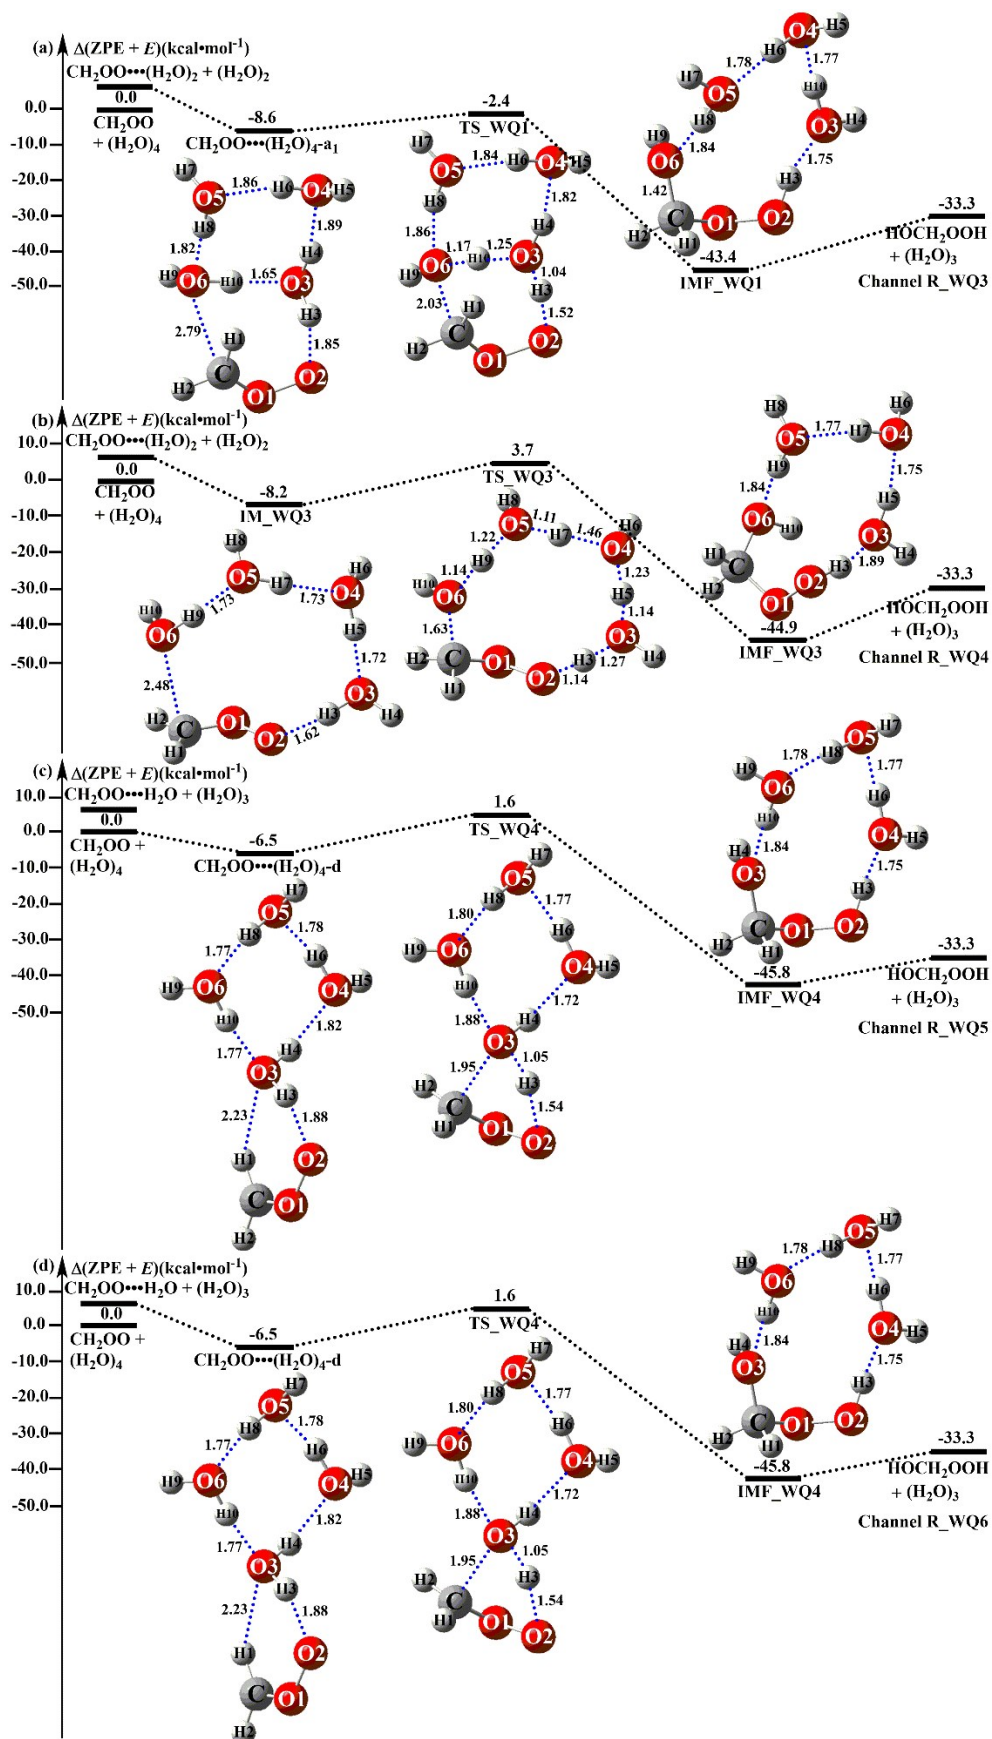

**Fig. S6** Schematic energy diagrams for the unfavorable routes of the  $\text{CH}_2\text{OO} + (\text{H}_2\text{O})_4$  reaction at the CCSD(T)-F12a/cc-pVDZ-F12//B3LYP/6-311+G(2d,2p) level

## Born-Oppenheimer molecular dynamics simulations

To examine the reaction between CH<sub>2</sub>OO and (H<sub>2</sub>O)<sub>n</sub> ( $n = 1-3$ ) at the gas phase using the BOMD simulations based on the DFT method employed in the CP2K<sup>1</sup> program package. The atomic forces were calculated within the DFT framework using the BOMD simulation. To avoid the effects of initial configurations, we only choose the CH<sub>2</sub>OO⋯(H<sub>2</sub>O)<sub>n</sub> ( $n = 1-3$ ) complex with the largest concentration and stabilizing energy were produced by the TGmin program. A cubic simulation box of side 35 Å was used. The resulting box size was found to be large enough to eliminate any interaction between the adjacent periodic images. The system was fully relaxed using a DFT method preceding the BOMD simulations, where the exchange and correlation interaction is treated with the Becke-Lee-Yang-Parr (BLYP)<sup>2,3</sup> functional. To account for the weak dispersion interactions (BLYP-D3), the Grimme's dispersion correction method<sup>4,5</sup> was applied. The valence and the core electrons were treated by a double- $\zeta$  Gaussian basis set combined with an auxiliary basis set<sup>6</sup> and the Goedecker-Teter-Hutter (GTH) norm-conserved pseudopotentials.<sup>7</sup> For the plane-wave basis set, an energy cutoff of 280 Rydberg was used while a 40 Rydberg cutoff was used for the Gaussian basis set. The BOMD (BLYP-D3) simulation was performed in the constant volume and temperature ensemble (NVT) and the constant energy and volume ensemble (NVE), accompanied by the Nose-Hoover chain method for controlling the temperature (300 K) of the system. The integration step is set as 1 fs, which has been previously shown to attain sufficient energy conservation for the water system.<sup>8-13</sup>

### Reference

1. J. VandeVondele, M. Krack, F. Mohamed, M. Parrinello, T. Chassaing and J. Hutter, *Comput. Phys. Commun.*, 2005, **167**, 103-128.
2. D. Becke, *Phys. Rev. A*, 1988, **38**, 3098.
3. T. Lee, W. T. Yang and R. G. Parr, *Phys. Rev. B*, 1988, **37**, 785.
4. S. Grimme, *J. Comput. Chem.*, 2004, **25**, 1463-1473.
5. S. Grimme, *J. Comput. Chem.*, 2006, **27**, 1787-1799.
6. S. Goedecker, M. Teter and J. Hutter, *Phys. Rev. B*, 1996, **54**, 1703.
7. C. Hartwigsen, S. Goedecker and J. Hutter, *Phys. Rev. B*, 1998, **58**, 3641
8. J. Zhong, M. Kumar, J. S. Francisco and X. C. Zeng, *Acc. Chem. Res.*, 2018, **51**, 1229-1237.
9. C. Zhu, M. Kumar, J. Zhong, L. Li, J. S. Francisco and X. C. Zeng, *J. Am. Chem. Soc.*, 2016, **138**, 11164-11169.
10. L. Li, M. Kumar, C. Q. Zhu, J. Zhong, J. S. Francisco and X. C. Zeng, *J. Am. Chem. Soc.*, 2016, **138**, 1816-1819.
11. J. Zhong, M. Kumar, C. Q. Zhu, J. S. Francisco and X. C. Zeng, *Angew. Chem., Int. Ed.*, 2017, **56**, 7740-7744.
12. M. Kumar, J. Zhong, X. C. Zeng and J. S. Francisco, *Chem. Sci.*, 2017, **8**, 5385-5391.
13. M. Kumar, J. Zhong, X. C. Zeng and J. S. Francisco, *J. Am. Chem. Soc.*, 2018, **140**, 4913-4921.

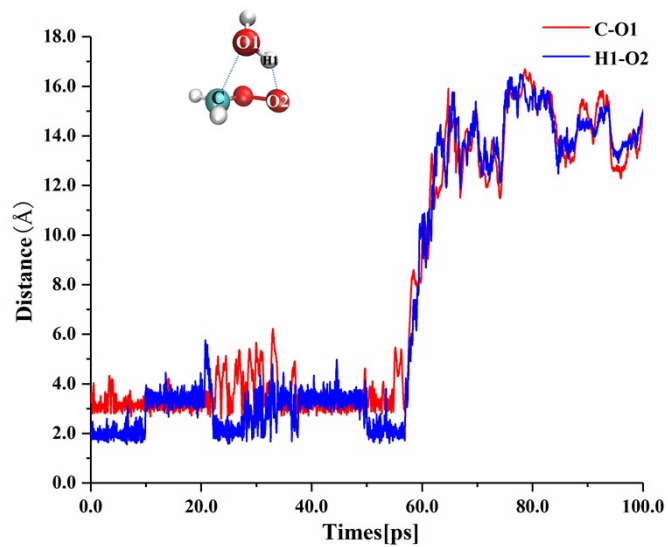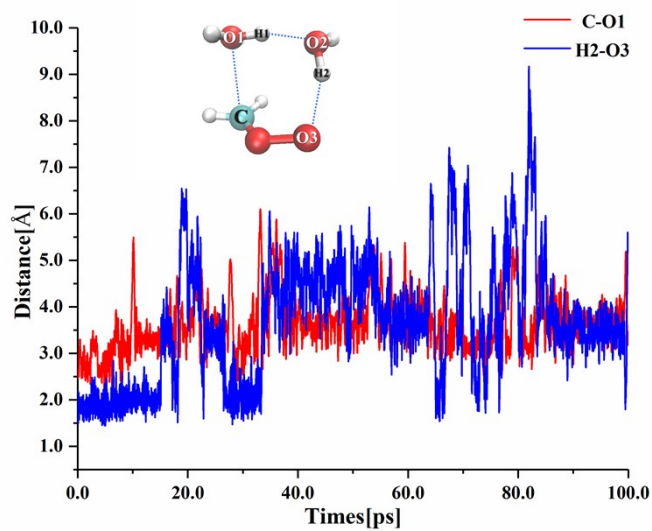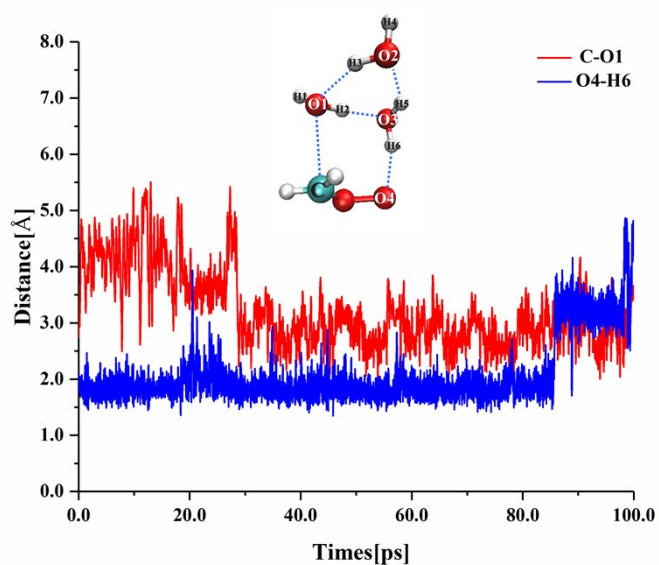

Fig. S7 The trajectories of BOMD simulation combined with NVT ensemble for the the favorable channels of the gas phase hydrolysis reaction of  $\text{CH}_2\text{OO}$  with  $(\text{H}_2\text{O})_n$  ( $n = 1-3$ )



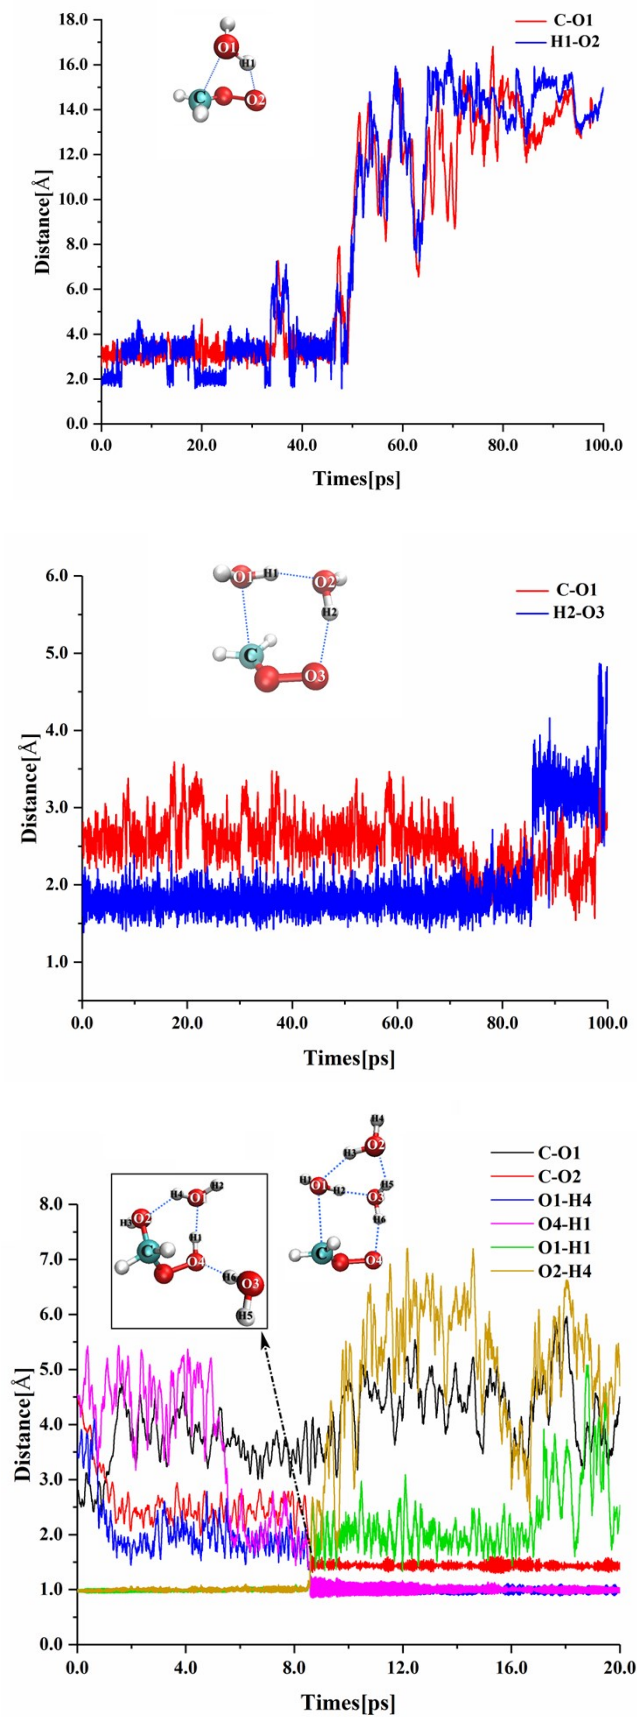

Fig. S8 The trajectories of BOMD simulation combined with NVE ensemble for the the favorable channels of the gas phase hydrolysis reaction of  $\text{CH}_2\text{OO}$  with  $(\text{H}_2\text{O})_n$  ( $n = 1-3$ )

Above BOMD simulations results of the NVE simulation results show that the  $\text{CH}_2\text{OO} + \text{H}_2\text{O}$  and  $\text{CH}_2\text{OO} + (\text{H}_2\text{O})_2$  reactions will not occur within the time scale of 100 ps. However, the NVE simulation results show that the  $\text{CH}_2\text{OO} + (\text{H}_2\text{O})_3$  reaction can be completed at 7.0 ps. This difference may be due to the additional water molecules increasing the stability of  $\text{CH}_2\text{OO}$  in the atmosphere. These results probably support that the gas phase reaction of  $\text{CH}_2\text{OO} + (\text{H}_2\text{O})_3$  reaction is not negligible in the atmosphere. Besides, the results of the NVT simulation show that all the favorable channels involved in the reaction of  $\text{CH}_2\text{OO}$  and  $(\text{H}_2\text{O})_n$  ( $n = 1-3$ ) cannot react on a time scale of 100 ps. This is slower by 2-3 orders of magnitude than that at the air/water interface reported by Zhu *et al.*<sup>39</sup>, indicating that the gas phase reaction of  $\text{CH}_2\text{OO}$  with  $(\text{H}_2\text{O})_n$  ( $n = 1-3$ ) may be harder to occur as compared with its hydrolysis at the air/water interface.

1. C. Zhu, M. Kumar, J. Zhong, L. Li, J. S. Francisco and X. C. Zeng, *J. Am. Chem. Soc.*, 2016, **138**, 11164-11169.



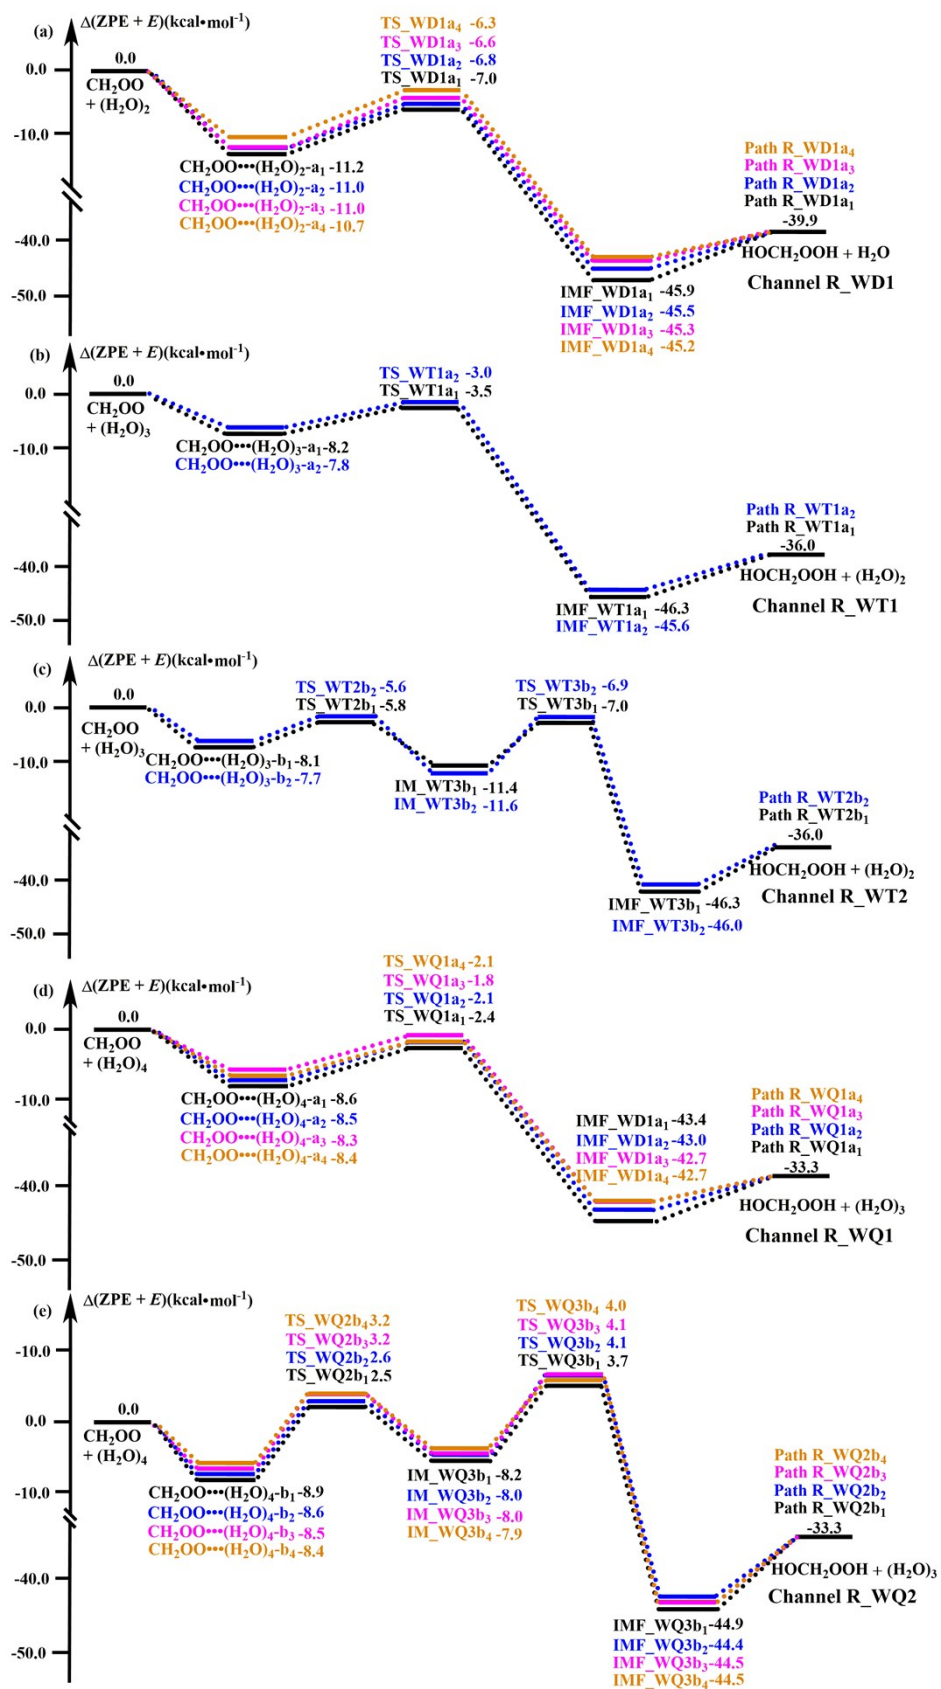

**Fig. S9** Schematic energy diagrams for the favorable channels of the  $\text{CH}_2\text{OO} + (\text{H}_2\text{O})_n$  ( $n = 2-4$ ) reactions starting from geometric isomers of  $\text{CH}_2\text{OO}\cdots(\text{H}_2\text{O})_n$  ( $n = 2-4$ ) complexes at the CCSD(T)-F12a/cc-pVDZ-F12//B3LYP/6-311+G(2d,2p) level

**Table S4** Rate constants ( $\text{cm}^3 \cdot \text{molecules}^{-1} \cdot \text{s}^{-1}$ ) for the  $\text{CH}_2\text{OO} + (\text{H}_2\text{O})_n$  ( $n = 1-4$ ) reaction within the temperature range of 290-320 K

| Catalyst                    | Rate Constant.              | Temperature(K) |          |          |          |          |
|-----------------------------|-----------------------------|----------------|----------|----------|----------|----------|
|                             |                             | 290            | 298      | 300      | 310      | 320      |
| Channel<br>R_WM1            | $K_{\text{eq}}$             | 7.94E-21       | 5.84E-21 | 5.42E-21 | 3.80E-21 | 2.72E-21 |
|                             | $k_{\text{uni}}$            | 2.82E+04       | 4.14E+04 | 4.54E+04 | 7.08E+04 | 1.07E+05 |
|                             | $k_{\text{b}}$              | 2.24E-16       | 2.42E-16 | 2.46E-16 | 2.69E-16 | 2.92E-16 |
| Path<br>R_WD1a <sub>1</sub> | $K_{\text{eq}}$             | 3.11E-20       | 2.02E-20 | 1.82E-20 | 1.11E-20 | 6.95E-21 |
|                             | $k_{\text{uni}}$            | 3.21E+08       | 3.69E+08 | 3.81E+08 | 4.47E+08 | 5.19E+08 |
|                             | $k_{\text{b}}$              | 9.96E-12       | 7.45E-12 | 6.94E-12 | 4.95E-12 | 3.61E-12 |
| Channel<br>R_WD2            | $K_{\text{eq}}$             | 1.78E-21       | 1.25E-21 | 1.15E-21 | 7.65E-22 | 5.23E-22 |
|                             | $k_{\text{uni}}$            | 3.21E+08       | 3.69E+08 | 3.81E+08 | 4.47E+08 | 5.19E+08 |
|                             | $k_{\text{b}}$              | 5.69E-13       | 4.61E-13 | 4.38E-13 | 3.42E-13 | 2.72E-13 |
| Channel<br>R_WD3            | $K_{\text{eq}}$             | 9.18E-22       | 7.74E-22 | 7.43E-22 | 6.12E-22 | 5.12E-22 |
|                             | $k_{\text{uni}}$            | 6.76E+03       | 9.51E+03 | 1.03E+04 | 1.53E+04 | 2.21E+04 |
|                             | $k_{\text{b}}$              | 6.21E-18       | 7.36E-18 | 7.67E-18 | 9.36E-18 | 1.13E-17 |
| Channel<br>R_WD4            | $K_{\text{eq}}$             | 5.25E-23       | 4.79E-23 | 4.69E-23 | 4.23E-23 | 3.85E-23 |
|                             | $k_{\text{uni}}$            | 6.76E+03       | 9.51E+03 | 1.03E+04 | 1.53E+04 | 2.21E+04 |
|                             | $k_{\text{b}}$              | 3.55E-19       | 4.56E-19 | 4.84E-19 | 6.47E-19 | 8.51E-19 |
| Path<br>R_WT1a <sub>1</sub> | $K_{\text{eq}}$             | 4.25E-21       | 2.92E-21 | 2.67E-21 | 1.73E-21 | 1.15E-21 |
|                             | $k_{\text{uni}}$            | 7.82E+08       | 9.42E+08 | 9.85E+08 | 1.22E+09 | 1.49E+09 |
|                             | $k_{\text{b}}$              | 3.33E-12       | 2.75E-12 | 2.63E-12 | 2.11E-12 | 1.72E-12 |
| Path<br>R_WT2b <sub>1</sub> | $K_{\text{eq}}$             | 1.17E-20       | 8.22E-21 | 7.54E-21 | 5.00E-21 | 3.40E-21 |
|                             | $k_{\text{uni}}^{\text{a}}$ | 6.57E+07       | 7.60E+07 | 7.88E+07 | 9.31E+07 | 1.09E+08 |
|                             | $k_{\text{b}}$              | 7.71E-13       | 6.25E-13 | 5.94E-13 | 4.65E-13 | 3.70E-13 |
| Channel<br>R_WT3            | $K_{\text{eq}}$             | 4.50E-23       | 3.74E-23 | 3.58E-23 | 2.89E-23 | 2.37E-23 |
|                             | $k_{\text{uni}}$            | 7.82E+08       | 9.42E+08 | 9.85E+08 | 1.22E+09 | 1.49E+09 |
|                             | $k_{\text{b}}$              | 3.52E-14       | 3.52E-14 | 3.52E-14 | 3.53E-14 | 3.53E-14 |
| Channel                     | $K_{\text{eq}}$             | 2.13E-20       | 1.53E-20 | 1.41E-20 | 9.65E-21 | 6.75E-21 |

|                             |                  |          |          |          |          |          |
|-----------------------------|------------------|----------|----------|----------|----------|----------|
|                             | $k_{\text{uni}}$ | 6.57E+07 | 7.61E+07 | 7.88E+07 | 9.32E+07 | 1.09E+08 |
|                             | $k_{\text{b}}$   | 1.40E-12 | 1.17E-12 | 1.11E-12 | 8.99E-13 | 7.34E-13 |
| Channel<br>R_WT5            | $K_{\text{eq}}$  | 1.81E-20 | 1.32E-20 | 1.22E-20 | 8.51E-21 | 6.07E-21 |
|                             | $k_{\text{uni}}$ | 5.22E+05 | 7.24E+05 | 7.83E+05 | 1.14E+06 | 1.63E+06 |
|                             | $k_{\text{b}}$   | 9.43E-15 | 9.55E-15 | 9.58E-15 | 9.73E-15 | 9.88E-15 |
| Channel<br>R_WT6            | $K_{\text{eq}}$  | 7.48E-23 | 5.85E-23 | 5.51E-23 | 4.14E-23 | 3.18E-23 |
|                             | $k_{\text{uni}}$ | 5.22E+05 | 7.24E+05 | 7.83E+05 | 1.14E+06 | 1.63E+06 |
|                             | $k_{\text{b}}$   | 3.91E-17 | 4.23E-17 | 4.31E-17 | 4.74E-17 | 5.18E-17 |
| Path<br>R_WQ1a <sub>1</sub> | $K_{\text{eq}}$  | 5.35E-21 | 4.09E-21 | 3.83E-21 | 2.81E-21 | 2.11E-21 |
|                             | $k_{\text{uni}}$ | 2.87E+07 | 3.38E+07 | 3.52E+07 | 4.25E+07 | 5.08E+07 |
|                             | $k_{\text{b}}$   | 1.54E-13 | 1.38E-13 | 1.35E-13 | 1.20E-13 | 1.07E-13 |
| Path<br>R_WQ2b <sub>1</sub> | $K_{\text{eq}}$  | 1.71E-20 | 1.25E-20 | 1.16E-20 | 8.12E-21 | 5.82E-21 |
|                             | $k_{\text{uni}}$ | 6.41E+01 | 9.54E+01 | 1.05E+02 | 1.67E+02 | 2.57E+02 |
|                             | $k_{\text{b}}$   | 1.10E-18 | 1.19E-18 | 1.22E-18 | 1.35E-18 | 1.50E-18 |
| Channel<br>R_WQ3            | $K_{\text{eq}}$  | 6.60E-21 | 4.67E-21 | 4.29E-21 | 2.87E-21 | 1.98E-21 |
|                             | $k_{\text{uni}}$ | 2.87E+07 | 3.38E+07 | 3.52E+07 | 4.25E+07 | 5.08E+07 |
|                             | $k_{\text{b}}$   | 1.89E-13 | 1.58E-13 | 1.51E-13 | 1.22E-13 | 1.00E-13 |
| Channel<br>R_WQ4            | $K_{\text{eq}}$  | 3.67E-20 | 2.50E-20 | 2.28E-20 | 1.46E-20 | 9.64E-21 |
|                             | $k_{\text{uni}}$ | 6.45E+01 | 9.60E+01 | 1.06E+02 | 1.68E+02 | 2.58E+02 |
|                             | $k_{\text{b}}$   | 2.37E-18 | 2.40E-18 | 2.40E-18 | 2.45E-18 | 2.49E-18 |
| Channel<br>R_WQ5            | $K_{\text{eq}}$  | 3.36E-21 | 2.67E-21 | 2.53E-21 | 1.94E-21 | 1.52E-21 |
|                             | $k_{\text{uni}}$ | 3.75E+05 | 5.33E+05 | 5.80E+05 | 8.72E+05 | 1.28E+06 |
|                             | $k_{\text{b}}$   | 1.26E-15 | 1.42E-15 | 1.47E-15 | 1.69E-15 | 1.94E-15 |
| Channel<br>R_WQ6            | $K_{\text{eq}}$  | 2.24E-20 | 1.47E-20 | 1.33E-20 | 8.21E-21 | 5.21E-21 |
|                             | $k_{\text{uni}}$ | 3.75E+05 | 5.33E+05 | 5.80E+05 | 8.72E+05 | 1.28E+06 |
|                             | $k_{\text{b}}$   | 8.40E-15 | 7.86E-15 | 7.73E-15 | 7.15E-15 | 6.65E-15 |

<sup>a</sup>  $k_{\text{uni}}$  of stepwise Path R\_WT2b<sub>1</sub> has been calculated according to the canonical unified statistical model described by  $\frac{1}{k_{\text{uni}}(\text{WT2b}_1)} = \frac{1}{k(\text{TS\_WT2b}_1)} + \frac{1}{k(\text{TS\_WT3b}_1)}$ ,  $k(\text{TS\_WT2b}_1)$  and  $k(\text{TS\_WT3b}_1)$  is

respectively the rate constants for the elementary reaction occurring through TS\_WT2b<sub>1</sub> and TS\_WT3b<sub>1</sub>.

**Table S5** The high-pressure canonical rate constant  $k_{\text{total}}$  ( $\text{cm}^3 \cdot \text{molecule}^{-1} \cdot \text{s}^{-1}$ ) and the calculated branching ratio ( $\beta$ )  $k_1$  (pre-reactive complex  $\text{IM\_WD1a}_1 \rightarrow \text{reactants CH}_2\text{OO} + (\text{H}_2\text{O})_2$ ) and  $k_2$  (pre-reactive complex  $\text{IM\_WD1a}_1 \rightarrow \text{transition state TS\_WD1a}_1 \rightarrow \text{products HOCH}_2\text{OO} + \text{H}_2\text{O}$ ) within the temperature range of 213-320 K

| $T(\text{K})$ | $k_1$    | $k_2$    | $\beta(k_1/k_2)$ | $k_{\text{total}}$ | $k_{\text{R\_WD1a1}}(\text{CVT/SCT})$ |
|---------------|----------|----------|------------------|--------------------|---------------------------------------|
| 213           | 8.35E+04 | 3.97E+07 | 0.00             | 4.86E-09           | 4.99E-10                              |
| 230           | 6.44E+05 | 7.02E+07 | 0.01             | 1.11E-09           | 1.68E-10                              |
| 259           | 2.20E+07 | 1.53E+08 | 0.14             | 1.38E-10           | 3.65E-11                              |
| 280           | 6.13E+07 | 2.41E+08 | 0.25             | 3.96E-11           | 1.47E-11                              |
| 290           | 3.26E+08 | 2.91E+08 | 1.12             | 2.32E-11           | 9.96E-12                              |
| 298           | 4.22E+08 | 3.35E+08 | 1.26             | 1.56E-11           | 7.45E-12                              |
| 300           | 3.56E+08 | 3.46E+08 | 1.03             | 1.41E-11           | 6.94E-12                              |
| 310           | 4.60E+08 | 4.07E+08 | 1.13             | 8.88E-12           | 4.95E-12                              |
| 320           | 8.25E+08 | 4.72E+08 | 1.75             | 5.73E-12           | 3.61E-12                              |

The high pressure canonical total rate coefficient for the reaction of  $\text{CH}_2\text{OO}$  with water dimer was calculated using MESMER program.<sup>1</sup> The total rate constant was calculated based on the following scheme. At first, the Criegee intermediate and water dimer are combined together to form intermediate ( $\text{IM\_WD1a}_1$ ) and this step is considered to be at equilibrium. The second step is that the formed  $\text{IM\_WD1a}_1$  undergo unimolecular reaction via transition state. The rate constant for the unimolecular reaction was calculated using RRKM theory with Eckart tunneling correction as implemented in MESMER program. The calculated rate constant were given in Table S5.

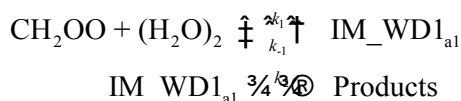

Based on the calculated total rate constant, the reaction between Criegee intermediate with water dimer is significantly high compared with Criegee intermediate with water monomer. The calculated rate constant is based on pre-equilibrium condition. The branching ratio ( $\beta$ ) is the ratio between  $k_1$  and  $k_2$  was calculated and given in Table S5. Based on the branching ratio values, it will be obvious to come to the conclusion that, though the pre-equilibrium condition may not be appropriate at lower temperature (below 290 K) conditions, they become more appropriate when the temperature is above 290 K. Based on above conclusion that the pre-equilibrium approximation is appropriate above 290 K, the calculated temperature range of 290-320 K has been chosen in the whole manuscript.

#### Reference

2. D. R. Glowacki, C. H. Liang, C. Morley, M. J. Pilling and S. H. Robertson, *J. Phys. Chem. A*, 2012, **116**, 9545-9560.

**Table S6** Rate constants ( $\text{cm}^3 \cdot \text{molecules}^{-1} \cdot \text{s}^{-1}$ ) of hydrogen atoms isomerization with the favorable routes for the  $\text{CH}_2\text{OO} + (\text{H}_2\text{O})_n$  ( $n = 2-4$ ) reaction within the temperature range of 290-320 K<sup>a</sup>

| $T/\text{K}$ | $k_{\text{R\_WD1a1}}$ | $k_{\text{R\_WD1a2}}$ | $k_{\text{R\_WD1a3}}$ | $k_{\text{R\_WD1a4}}$                   | $k_{\text{R\_WD1}}$                     | $k_{\text{R\_WD1a1}}/k_{\text{R\_WD1}}$ | $k_{\text{R\_WD1a2}}/k_{\text{R\_WD1}}$ | $k_{\text{R\_WD1a3}}/k_{\text{R\_WD1}}$ | $k_{\text{R\_WD1a4}}/k_{\text{R\_WD1}}$ |                                         |
|--------------|-----------------------|-----------------------|-----------------------|-----------------------------------------|-----------------------------------------|-----------------------------------------|-----------------------------------------|-----------------------------------------|-----------------------------------------|-----------------------------------------|
| 290          | 9.96E-12              | 8.82E-12              | 7.79E-12              | 1.12E-12                                | 2.77E-11                                | 0.36                                    | 0.32                                    | 0.28                                    | 0.04                                    |                                         |
| 298          | 7.45E-12              | 6.42E-12              | 5.87E-12              | 8.83E-13                                | 2.06E-11                                | 0.36                                    | 0.31                                    | 0.28                                    | 0.04                                    |                                         |
| 300          | 6.94E-12              | 5.91E-12              | 5.49E-12              | 8.35E-13                                | 1.92E-11                                | 0.36                                    | 0.31                                    | 0.29                                    | 0.04                                    |                                         |
| 310          | 4.95E-12              | 4.53E-12              | 3.95E-12              | 6.35E-13                                | 1.41E-11                                | 0.35                                    | 0.32                                    | 0.28                                    | 0.05                                    |                                         |
| 320          | 3.61E-12              | 3.09E-12              | 2.90E-12              | 4.92E-13                                | 1.01E-11                                | 0.36                                    | 0.31                                    | 0.29                                    | 0.05                                    |                                         |
| $T/\text{K}$ | $k_{\text{R\_WT1a1}}$ | $k_{\text{R\_WT1a2}}$ | $k_{\text{R\_WT1}}$   | $k_{\text{R\_WT1a1}}/k_{\text{R\_WT1}}$ | $k_{\text{R\_WT1a2}}/k_{\text{R\_WT1}}$ | $k_{\text{R\_WT2b1}}$                   | $k_{\text{R\_WT2b2}}$                   | $k_{\text{R\_WT2}}$                     | $k_{\text{R\_WT2b1}}/k_{\text{R\_WT2}}$ | $k_{\text{R\_WT2b2}}/k_{\text{R\_WT2}}$ |
| 290          | 3.33E-12              | 3.22E-12              | 6.55E-12              | 0.51                                    | 0.49                                    | 7.71E-13                                | 4.28E-13                                | 1.20E-12                                | 0.64                                    | 0.36                                    |
| 298          | 2.75E-12              | 2.83E-12              | 5.58E-12              | 0.49                                    | 0.51                                    | 6.25E-13                                | 3.13E-13                                | 9.38E-13                                | 0.67                                    | 0.33                                    |
| 300          | 2.63E-12              | 2.75E-12              | 5.38E-12              | 0.49                                    | 0.51                                    | 5.94E-13                                | 2.70E-13                                | 8.64E-13                                | 0.69                                    | 0.31                                    |
| 310          | 2.11E-12              | 1.61E-12              | 3.72E-12              | 0.57                                    | 0.43                                    | 4.65E-13                                | 2.11E-13                                | 6.76E-13                                | 0.69                                    | 0.31                                    |
| 320          | 1.72E-12              | 1.15E-12              | 2.87E-12              | 0.60                                    | 0.40                                    | 3.70E-13                                | 1.48E-13                                | 5.18E-13                                | 0.71                                    | 0.29                                    |
| $T/\text{K}$ | $k_{\text{R\_WQ1a1}}$ | $k_{\text{R\_WQ1a2}}$ | $k_{\text{R\_WQ1a3}}$ | $k_{\text{R\_WQ1a4}}$                   | $k_{\text{R\_WQ1}}$                     | $k_{\text{R\_WQ1a1}}/k_{\text{R\_WQ1}}$ | $k_{\text{R\_WQ1a2}}/k_{\text{R\_WQ1}}$ | $k_{\text{R\_WQ1a3}}/k_{\text{R\_WQ1}}$ | $k_{\text{R\_WQ1a4}}/k_{\text{R\_WQ1}}$ |                                         |
| 290          | 1.54E-13              | 1.16E-13              | 9.24E-14              | 3.08E-14                                | 3.93E-13                                | 0.39                                    | 0.30                                    | 0.23                                    | 0.08                                    |                                         |
| 298          | 1.38E-13              | 1.04E-13              | 8.28E-14              | 2.76E-14                                | 3.52E-13                                | 0.39                                    | 0.30                                    | 0.23                                    | 0.08                                    |                                         |
| 300          | 1.35E-13              | 1.01E-13              | 8.10E-14              | 2.70E-14                                | 3.44E-13                                | 0.39                                    | 0.29                                    | 0.24                                    | 0.08                                    |                                         |
| 310          | 1.20E-13              | 9.00E-14              | 7.20E-14              | 2.40E-14                                | 3.06E-13                                | 0.39                                    | 0.29                                    | 0.24                                    | 0.08                                    |                                         |
| 320          | 1.07E-13              | 8.03E-14              | 6.42E-14              | 2.14E-14                                | 2.73E-13                                | 0.39                                    | 0.29                                    | 0.24                                    | 0.08                                    |                                         |
| $T/\text{K}$ | $k_{\text{R\_WQ2b1}}$ | $k_{\text{R\_WQ2b2}}$ | $k_{\text{R\_WQ2b3}}$ | $k_{\text{R\_WQ2b4}}$                   | $k_{\text{R\_WQ2}}$                     | $k_{\text{R\_WQ2b1}}/k_{\text{R\_WQ2}}$ | $k_{\text{R\_WQ2b2}}/k_{\text{R\_WQ2}}$ | $k_{\text{R\_WQ2b3}}/k_{\text{R\_WQ2}}$ | $k_{\text{R\_WQ2b4}}/k_{\text{R\_WQ2}}$ |                                         |
| 290          | 1.10E-18              | 3.30E-19              | 3.40E-19              | 1.83E-19                                | 1.95E-18                                | 0.56                                    | 0.17                                    | 0.17                                    | 0.09                                    |                                         |
| 298          | 1.19E-18              | 4.46E-19              | 3.76E-19              | 1.98E-19                                | 2.21E-18                                | 0.54                                    | 0.20                                    | 0.17                                    | 0.09                                    |                                         |
| 300          | 1.22E-18              | 6.10E-19              | 5.88E-19              | 2.03E-19                                | 2.62E-18                                | 0.47                                    | 0.23                                    | 0.22                                    | 0.08                                    |                                         |
| 310          | 1.35E-18              | 8.75E-19              | 7.40E-19              | 2.25E-19                                | 3.19E-18                                | 0.42                                    | 0.27                                    | 0.23                                    | 0.07                                    |                                         |
| 320          | 1.50E-18              | 1.13E-18              | 8.00E-19              | 2.50E-19                                | 3.68E-18                                | 0.41                                    | 0.31                                    | 0.22                                    | 0.07                                    |                                         |

<sup>a</sup>  $k_{\text{R\_WD1a1}}$ ,  $k_{\text{R\_WD1a2}}$ ,  $k_{\text{R\_WD1a3}}$  and  $k_{\text{R\_WD1a4}}$  is the rate constants for the Path R\_WD1a<sub>1</sub>, R\_WD1a<sub>2</sub>, R\_WD1a<sub>3</sub> and R\_WD1a<sub>4</sub> in Channel R\_WD1 (see Fig. S8);  $k_{\text{R\_WT1a1}}$ ,  $k_{\text{R\_WT1a2}}$ ,  $k_{\text{R\_WT2a1}}$  and  $k_{\text{R\_WT2a2}}$  is the rate constants for the Path R\_WT1a<sub>1</sub>, R\_WT1a<sub>2</sub>, R\_WT2a<sub>1</sub> and R\_WT2a<sub>2</sub> in Channel R\_WT1 and Channel R\_WT2, respectively (see Fig. S8);  $k_{\text{R\_WQ1a1}}$ ,  $k_{\text{R\_WQ1a2}}$ ,  $k_{\text{R\_WQ1a3}}$  and  $k_{\text{R\_WQ1a4}}$  is the rate constants for the Path R\_WQ1a<sub>1</sub>, R\_WQ1a<sub>2</sub>, R\_WQ1a<sub>3</sub> and R\_WQ1a<sub>4</sub> in Channel R\_WQ1 (see Fig. S8);  $k_{\text{R\_WQ2b1}}$ ,  $k_{\text{R\_WQ2b2}}$ ,  $k_{\text{R\_WQ2b3}}$  and  $k_{\text{R\_WQ2b4}}$  is the rate constants for the Path R\_WQ2b<sub>1</sub>, R\_WQ2b<sub>2</sub>, R\_WQ2b<sub>3</sub> and R\_WQ2b<sub>4</sub> in Channel R\_WQ2 (see Fig. S8)

**Table S7** Rate constants ( $\text{cm}^3 \cdot \text{molecules}^{-1} \cdot \text{s}^{-1}$ ) and rate ratio for the unfavorable routes of the  $\text{CH}_2\text{OO} + (\text{H}_2\text{O})_n$  ( $n = 2-4$ ) reaction within the temperature range of 290-320 K<sup>a</sup>

| $T/\text{K}$ | $k_{\text{R\_WD2}}$                 | $k_{\text{R\_WD3}}$                 | $k_{\text{R\_WD4}}$                 | $k_{\text{R\_WT3}}$                 | $k_{\text{R\_WT4}}$                 | $k_{\text{R\_WT5}}$                 | $k_{\text{R\_WT6}}$                 | $k_{\text{R\_WQ3}}$                 | $k_{\text{R\_WQ4}}$                 | $k_{\text{R\_WQ5}}$                 | $k_{\text{R\_WQ6}}$                 |
|--------------|-------------------------------------|-------------------------------------|-------------------------------------|-------------------------------------|-------------------------------------|-------------------------------------|-------------------------------------|-------------------------------------|-------------------------------------|-------------------------------------|-------------------------------------|
| 290          | 5.69E-13                            | 6.21E-18                            | 3.55E-19                            | 3.52E-14                            | 1.40E-12                            | 9.43E-15                            | 3.91E-17                            | 1.89E-13                            | 2.37E-18                            | 1.26E-15                            | 8.40E-15                            |
| 298          | 4.61E-13                            | 7.36E-18                            | 4.56E-19                            | 3.52E-14                            | 1.17E-12                            | 9.55E-15                            | 4.23E-17                            | 1.58E-13                            | 2.40E-18                            | 1.42E-15                            | 7.86E-15                            |
| 300          | 4.38E-13                            | 7.67E-18                            | 4.84E-19                            | 3.52E-14                            | 1.11E-12                            | 9.58E-15                            | 4.31E-17                            | 1.51E-13                            | 2.40E-18                            | 1.47E-15                            | 7.73E-15                            |
| 310          | 3.42E-13                            | 9.36E-18                            | 6.47E-19                            | 3.53E-14                            | 8.99E-13                            | 9.73E-15                            | 4.74E-17                            | 1.22E-13                            | 2.45E-18                            | 1.69E-15                            | 7.15E-15                            |
| 320          | 2.72E-13                            | 1.13E-17                            | 8.51E-19                            | 3.53E-14                            | 7.34E-13                            | 9.88E-15                            | 5.18E-17                            | 1.00E-13                            | 2.49E-18                            | 1.94E-15                            | 6.65E-15                            |
| $T/\text{K}$ | $\nu_{\text{WD2}}/\nu_{\text{WD1}}$ | $\nu_{\text{WD3}}/\nu_{\text{WD1}}$ | $\nu_{\text{WD4}}/\nu_{\text{WD1}}$ | $\nu_{\text{WT3}}/\nu_{\text{WT1}}$ | $\nu_{\text{WT4}}/\nu_{\text{WT1}}$ | $\nu_{\text{WT5}}/\nu_{\text{WT1}}$ | $\nu_{\text{WT6}}/\nu_{\text{WT1}}$ | $\nu_{\text{WQ3}}/\nu_{\text{WQ1}}$ | $\nu_{\text{WQ4}}/\nu_{\text{WQ1}}$ | $\nu_{\text{WQ5}}/\nu_{\text{WQ1}}$ | $\nu_{\text{WQ6}}/\nu_{\text{WQ1}}$ |
| 290          | 2.05E-02                            | 2.24E-07                            | 1.28E-08                            | 5.37E-03                            | 2.14E-01                            | 1.44E-03                            | 5.97E-06                            | 4.81E-01                            | 6.03E-06                            | 3.21E-03                            | 2.14E-02                            |
| 298          | 2.24E-02                            | 3.57E-07                            | 2.21E-08                            | 6.31E-03                            | 2.10E-01                            | 1.71E-03                            | 7.58E-06                            | 4.49E-01                            | 6.82E-06                            | 4.03E-03                            | 2.23E-02                            |
| 300          | 2.28E-02                            | 3.99E-07                            | 2.52E-08                            | 6.54E-03                            | 2.06E-01                            | 1.78E-03                            | 8.01E-06                            | 4.39E-01                            | 6.98E-06                            | 4.27E-03                            | 2.25E-02                            |
| 310          | 2.43E-02                            | 6.64E-07                            | 4.59E-08                            | 9.49E-03                            | 2.42E-01                            | 2.62E-03                            | 1.27E-05                            | 3.99E-01                            | 8.01E-06                            | 5.52E-03                            | 2.34E-02                            |
| 320          | 2.69E-02                            | 1.12E-06                            | 8.43E-08                            | 1.23E-02                            | 2.56E-01                            | 3.44E-03                            | 1.80E-05                            | 3.66E-01                            | 9.12E-06                            | 7.11E-03                            | 2.44E-02                            |

<sup>a</sup>  $k_{\text{R\_WD2}}$ ,  $k_{\text{R\_WD3}}$ ,  $k_{\text{R\_WD4}}$ ,  $k_{\text{R\_WT3}}$ ,  $k_{\text{R\_WT4}}$ ,  $k_{\text{R\_WT5}}$ ,  $k_{\text{R\_WT6}}$ ,  $k_{\text{R\_WQ3}}$ ,  $k_{\text{R\_WQ4}}$ ,  $k_{\text{R\_WQ5}}$  and  $k_{\text{R\_WQ6}}$  is the rate constants for the Channels R\_WD2, R\_WD3, R\_WD4, R\_WT3, R\_WT4, R\_WT5, R\_WT6, R\_WQ3, R\_WQ4 and R\_WQ5 (see Fig. S4-S6), respectively;  $\nu_{\text{WD2}}/\nu_{\text{WD1}}$ ,  $\nu_{\text{WD3}}/\nu_{\text{WD1}}$  and  $\nu_{\text{WD4}}/\nu_{\text{WD1}}$  is respectively the relative rate of Channels R\_WD2, R\_WD3 and R\_WD4 to Channel R\_WD1;  $\nu_{\text{WT3}}/\nu_{\text{WT1}}$ ,  $\nu_{\text{WT4}}/\nu_{\text{WT1}}$ ,  $\nu_{\text{WT5}}/\nu_{\text{WT1}}$  and  $\nu_{\text{WT6}}/\nu_{\text{WT1}}$  is respectively the relative rate of Channels R\_WT3, R\_WT4, R\_WT5 and R\_WT6 to Channel R\_WT1;  $\nu_{\text{WQ3}}/\nu_{\text{WQ1}}$ ,  $\nu_{\text{WQ4}}/\nu_{\text{WQ1}}$ ,  $\nu_{\text{WQ5}}/\nu_{\text{WQ1}}$  and  $\nu_{\text{WQ6}}/\nu_{\text{WQ1}}$  is respectively the relative rate of Channels R\_WQ3, R\_WQ4, R\_WQ5 and R\_WQ6 to Channel R\_WQ1.

**Table S8** Calculated concentration of water clusters (in molecule-cm<sup>-3</sup>) within the temperature range of 290-320 K at different relative humidity (RH) at the ground level of the Earth's atmosphere<sup>a</sup>

| <i>T</i> (K)                       | 20% RH                | 40% RH                | 60% RH                | 80% RH                | 100% RH               |
|------------------------------------|-----------------------|-----------------------|-----------------------|-----------------------|-----------------------|
| [H <sub>2</sub> O]                 |                       |                       |                       |                       |                       |
| 290                                | 9.56×10 <sup>16</sup> | 1.91×10 <sup>17</sup> | 2.87×10 <sup>17</sup> | 3.82×10 <sup>17</sup> | 4.78×10 <sup>17</sup> |
| 298                                | 1.55×10 <sup>17</sup> | 3.09×10 <sup>17</sup> | 4.64×10 <sup>17</sup> | 6.18×10 <sup>17</sup> | 7.73×10 <sup>17</sup> |
| 300                                | 1.72×10 <sup>17</sup> | 3.43×10 <sup>17</sup> | 5.15×10 <sup>17</sup> | 6.86×10 <sup>17</sup> | 8.58×10 <sup>17</sup> |
| 310                                | 2.92×10 <sup>17</sup> | 5.84×10 <sup>17</sup> | 8.77×10 <sup>17</sup> | 1.17×10 <sup>18</sup> | 1.46×10 <sup>18</sup> |
| 320                                | 4.70×10 <sup>17</sup> | 9.40×10 <sup>17</sup> | 1.41×10 <sup>18</sup> | 1.88×10 <sup>18</sup> | 2.35×10 <sup>18</sup> |
| [(H <sub>2</sub> O) <sub>2</sub> ] |                       |                       |                       |                       |                       |
| 290                                | 2.36×10 <sup>13</sup> | 9.46×10 <sup>13</sup> | 2.13×10 <sup>14</sup> | 3.78×10 <sup>14</sup> | 5.91×10 <sup>14</sup> |
| 298                                | 5.44×10 <sup>13</sup> | 2.18×10 <sup>14</sup> | 4.90×10 <sup>14</sup> | 8.70×10 <sup>14</sup> | 1.36×10 <sup>15</sup> |
| 300                                | 6.50×10 <sup>13</sup> | 2.60×10 <sup>14</sup> | 5.85×10 <sup>14</sup> | 1.04×10 <sup>15</sup> | 1.62×10 <sup>15</sup> |
| 310                                | 1.63×10 <sup>14</sup> | 6.52×10 <sup>14</sup> | 1.47×10 <sup>15</sup> | 2.60×10 <sup>15</sup> | 4.06×10 <sup>15</sup> |
| 320                                | 3.71×10 <sup>14</sup> | 1.48×10 <sup>15</sup> | 3.33×10 <sup>15</sup> | 5.92×10 <sup>15</sup> | 9.24×10 <sup>15</sup> |
| [(H <sub>2</sub> O) <sub>3</sub> ] |                       |                       |                       |                       |                       |
| 290                                | 1.51×10 <sup>11</sup> | 1.21×10 <sup>12</sup> | 4.09×10 <sup>12</sup> | 9.68×10 <sup>12</sup> | 1.89×10 <sup>13</sup> |
| 298                                | 3.83×10 <sup>11</sup> | 3.06×10 <sup>12</sup> | 1.03×10 <sup>13</sup> | 2.45×10 <sup>13</sup> | 4.78×10 <sup>13</sup> |
| 300                                | 4.67×10 <sup>11</sup> | 3.73×10 <sup>12</sup> | 1.26×10 <sup>13</sup> | 2.98×10 <sup>13</sup> | 5.82×10 <sup>13</sup> |
| 310                                | 1.29×10 <sup>12</sup> | 1.03×10 <sup>13</sup> | 3.47×10 <sup>13</sup> | 8.22×10 <sup>13</sup> | 1.60×10 <sup>14</sup> |
| 320                                | 3.14×10 <sup>12</sup> | 2.51×10 <sup>13</sup> | 8.46×10 <sup>13</sup> | 2.00×10 <sup>14</sup> | 3.91×10 <sup>14</sup> |
| [(H <sub>2</sub> O) <sub>4</sub> ] |                       |                       |                       |                       |                       |
| 290                                | 1.40×10 <sup>10</sup> | 2.23×10 <sup>11</sup> | 1.13×10 <sup>12</sup> | 3.57×10 <sup>12</sup> | 8.72×10 <sup>12</sup> |
| 298                                | 3.68×10 <sup>10</sup> | 5.89×10 <sup>11</sup> | 2.98×10 <sup>12</sup> | 9.42×10 <sup>12</sup> | 2.30×10 <sup>13</sup> |
| 300                                | 4.54×10 <sup>10</sup> | 7.26×10 <sup>11</sup> | 3.67×10 <sup>12</sup> | 1.16×10 <sup>13</sup> | 2.83×10 <sup>13</sup> |
| 310                                | 1.30×10 <sup>11</sup> | 2.09×10 <sup>12</sup> | 1.06×10 <sup>13</sup> | 3.33×10 <sup>13</sup> | 8.11×10 <sup>13</sup> |
| 320                                | 3.25×10 <sup>11</sup> | 5.19×10 <sup>12</sup> | 2.62×10 <sup>13</sup> | 8.29×10 <sup>13</sup> | 2.02×10 <sup>14</sup> |

<sup>a</sup> The values are reported from reference (*J. Phys. Chem. A*, 2013, **117**, 10381-10396.).

**Table S9** The relative rate for the hydrolysis of CH<sub>2</sub>OO with (H<sub>2</sub>O)<sub>n</sub> (n = 1-4) at different relative humidity (RH)<sup>a</sup>

| RH   | T(K) | $v_{\text{WDI}}/v_{\text{WMI}}$ | $v_{\text{WTI}}/v_{\text{WMI}}$ | $v_{\text{WQI}}/v_{\text{WMI}}$ |
|------|------|---------------------------------|---------------------------------|---------------------------------|
| 20%  | 290  | 30.53                           | 0.05                            | 0.00026                         |
|      | 298  | 29.88                           | 0.06                            | 0.00035                         |
|      | 300  | 29.50                           | 0.06                            | 0.00037                         |
|      | 310  | 29.26                           | 0.06                            | 0.00051                         |
|      | 320  | 27.30                           | 0.07                            | 0.00065                         |
| 40%  | 290  | 61.25                           | 0.19                            | 0.0020                          |
|      | 298  | 60.06                           | 0.23                            | 0.0028                          |
|      | 300  | 59.16                           | 0.24                            | 0.0030                          |
|      | 310  | 58.52                           | 0.24                            | 0.0041                          |
|      | 320  | 54.46                           | 0.26                            | 0.0052                          |
| 60%  | 290  | 91.78                           | 0.42                            | 0.0069                          |
|      | 298  | 89.89                           | 0.51                            | 0.0093                          |
|      | 300  | 88.66                           | 0.54                            | 0.0100                          |
|      | 310  | 87.86                           | 0.55                            | 0.0137                          |
|      | 320  | 81.69                           | 0.59                            | 0.0174                          |
| 80%  | 290  | 122.37                          | 0.74                            | 0.016                           |
|      | 298  | 119.83                          | 0.91                            | 0.022                           |
|      | 300  | 118.32                          | 0.95                            | 0.024                           |
|      | 310  | 116.48                          | 0.97                            | 0.032                           |
|      | 320  | 108.92                          | 1.05                            | 0.041                           |
| 100% | 290  | 152.89                          | 1.16                            | 0.032                           |
|      | 298  | 149.77                          | 1.43                            | 0.043                           |
|      | 300  | 147.36                          | 1.48                            | 0.046                           |
|      | 310  | 145.76                          | 1.52                            | 0.063                           |
|      | 320  | 136.00                          | 1.64                            | 0.080                           |

<sup>a</sup>  $v_{\text{WDI}}/v_{\text{WMI}}$ ,  $v_{\text{WTI}}/v_{\text{WMI}}$  and  $v_{\text{WQI}}/v_{\text{WMI}}$  is respectively the relative rate of Channels R\_WD1, R\_WT1 and R\_WQ1 to Channel R\_WMI.



**Table S10** Rate ratios of  $\nu_{\text{WM1}}/\nu_{\text{total}}$ ,  $\nu_{\text{WD1}}/\nu_{\text{total}}$ ,  $\nu_{\text{WT1}}/\nu_{\text{total}}$ ,  $\nu_{\text{WQ1}}/\nu_{\text{total}}$ , within the temperature range of 290-320 K at different relative humidity (RH)<sup>a</sup>

| RH   | T(K) | $\nu_{\text{WM1}}/\nu_{\text{total}}$ | $\nu_{\text{WD1}}/\nu_{\text{total}}$ | $\nu_{\text{WT1}}/\nu_{\text{total}}$ | $\nu_{\text{WQ1}}/\nu_{\text{total}}$ |
|------|------|---------------------------------------|---------------------------------------|---------------------------------------|---------------------------------------|
| 20%  | 290  | 0.03                                  | 0.97                                  | 0.001                                 | 0.000008                              |
|      | 298  | 0.03                                  | 0.97                                  | 0.002                                 | 0.000011                              |
|      | 300  | 0.03                                  | 0.97                                  | 0.002                                 | 0.000012                              |
|      | 310  | 0.03                                  | 0.96                                  | 0.002                                 | 0.000017                              |
|      | 320  | 0.04                                  | 0.96                                  | 0.002                                 | 0.000023                              |
| 40%  | 290  | 0.02                                  | 0.98                                  | 0.003                                 | 0.00003                               |
|      | 298  | 0.02                                  | 0.98                                  | 0.004                                 | 0.00005                               |
|      | 300  | 0.02                                  | 0.98                                  | 0.004                                 | 0.00005                               |
|      | 310  | 0.02                                  | 0.98                                  | 0.004                                 | 0.00007                               |
|      | 320  | 0.02                                  | 0.98                                  | 0.005                                 | 0.00009                               |
| 60%  | 290  | 0.01                                  | 0.98                                  | 0.004                                 | 0.00007                               |
|      | 298  | 0.01                                  | 0.98                                  | 0.006                                 | 0.00010                               |
|      | 300  | 0.01                                  | 0.98                                  | 0.006                                 | 0.00011                               |
|      | 310  | 0.01                                  | 0.98                                  | 0.006                                 | 0.00015                               |
|      | 320  | 0.01                                  | 0.98                                  | 0.007                                 | 0.00021                               |
| 80%  | 290  | 0.01                                  | 0.99                                  | 0.006                                 | 0.00013                               |
|      | 298  | 0.01                                  | 0.98                                  | 0.008                                 | 0.00018                               |
|      | 300  | 0.01                                  | 0.98                                  | 0.008                                 | 0.00020                               |
|      | 310  | 0.01                                  | 0.98                                  | 0.008                                 | 0.00027                               |
|      | 320  | 0.01                                  | 0.98                                  | 0.009                                 | 0.00037                               |
| 100% | 290  | 0.01                                  | 0.99                                  | 0.007                                 | 0.0002                                |
|      | 298  | 0.01                                  | 0.98                                  | 0.009                                 | 0.0003                                |
|      | 300  | 0.01                                  | 0.98                                  | 0.010                                 | 0.0003                                |
|      | 310  | 0.01                                  | 0.98                                  | 0.010                                 | 0.0004                                |
|      | 320  | 0.01                                  | 0.98                                  | 0.012                                 | 0.0006                                |

<sup>a</sup>  $\nu_{\text{total}} = \nu_{\text{WM1}} + \nu_{\text{WD1}} + \nu_{\text{WT1}} + \nu_{\text{WQ1}}$

**Table S11** Coordinates and geometrical structures for the stationary points in the favorable hydrolysis of CH<sub>2</sub>OO with (H<sub>2</sub>O)<sub>n</sub> (n = 1-4) reaction at the B3LYP/6-311+G(2d,2p) level

|                                                                      |             |             |             |                                                                      |             |             |             |
|----------------------------------------------------------------------|-------------|-------------|-------------|----------------------------------------------------------------------|-------------|-------------|-------------|
| <b>CH<sub>2</sub>OO···H<sub>2</sub>O</b>                             |             |             |             | <b>TS_WM</b>                                                         |             |             |             |
| O                                                                    | 1.79184600  | 0.03264100  | 0.01879600  | O                                                                    | 1.43920400  | -0.38078700 | -0.00701200 |
| H                                                                    | 1.15741700  | -0.70693900 | 0.10699200  | H                                                                    | 0.54499700  | -0.95182700 | 0.07514700  |
| H                                                                    | 2.23545400  | -0.10644600 | -0.82133000 | H                                                                    | 1.68892300  | -0.40506600 | -0.93828800 |
| O                                                                    | -0.68184300 | -1.16736000 | 0.18575000  | O                                                                    | -0.95091000 | -0.94342200 | 0.16801200  |
| O                                                                    | -0.99782500 | 0.05653600  | -0.37878600 | O                                                                    | -0.88340300 | 0.40398400  | -0.37611900 |
| C                                                                    | -0.57360700 | 1.07332700  | 0.20674100  | C                                                                    | 0.05502500  | 0.99702400  | 0.24766200  |
| H                                                                    | -0.07143100 | 0.98717500  | 1.15940700  | H                                                                    | 0.18944000  | 0.81980500  | 1.30604100  |
| H                                                                    | -0.77722500 | 2.01170700  | -0.29160200 | H                                                                    | 0.40736400  | 1.91674900  | -0.20792300 |
| <b>HOCH<sub>2</sub>OOH</b>                                           |             |             |             | <b>CH<sub>2</sub>OO···(H<sub>2</sub>O)<sub>2</sub>-a<sub>1</sub></b> |             |             |             |
| O                                                                    | 1.37952500  | -0.59499800 | -0.01565300 | O                                                                    | -1.34063700 | -1.42789200 | -0.08278900 |
| H                                                                    | -1.18002400 | -1.22727300 | -0.26074100 | H                                                                    | -1.93493700 | -1.82994400 | 0.55638700  |
| H                                                                    | 1.70853600  | -0.51936400 | -0.91696200 | H                                                                    | -1.56041600 | -0.46779600 | -0.08396300 |
| O                                                                    | -1.48364700 | -0.42225700 | 0.18273500  | O                                                                    | 1.15584500  | 1.19407100  | 0.24735600  |
| O                                                                    | -0.61438100 | 0.57962800  | -0.40159600 | O                                                                    | 1.33459500  | -0.00962600 | -0.44940300 |
| C                                                                    | 0.61277000  | 0.54225200  | 0.28655500  | C                                                                    | 1.12995300  | -1.05793200 | 0.18913000  |
| H                                                                    | 0.44227900  | 0.52514500  | 1.36029000  | H                                                                    | 0.89325100  | -1.00526200 | 1.24268100  |
| H                                                                    | 1.10061800  | 1.46899200  | -0.02580400 | H                                                                    | 1.26474200  | -1.97724800 | -0.36230800 |
|                                                                      |             |             |             | O                                                                    | -1.53412400 | 1.29154800  | 0.04601100  |
|                                                                      |             |             |             | H                                                                    | -0.55487600 | 1.41337700  | 0.12176700  |
|                                                                      |             |             |             | H                                                                    | -1.81292400 | 1.82965700  | -0.69874300 |
| <b>TS_WD1a<sub>1</sub></b>                                           |             |             |             | <b>IMF_WD1a<sub>1</sub></b>                                          |             |             |             |
| C                                                                    | -1.30421400 | 0.45291600  | 0.11771200  | C                                                                    | -1.37680300 | 0.32529500  | -0.13427100 |
| H                                                                    | -1.98490700 | 1.09454400  | -0.42658800 | H                                                                    | -1.96408900 | 0.64408500  | -0.99395600 |
| H                                                                    | -1.31468800 | 0.42591100  | 1.20037900  | H                                                                    | -2.01655000 | 0.05362100  | 0.70633800  |
| O                                                                    | -1.00758700 | -0.62333800 | -0.49493000 | O                                                                    | -0.68597100 | -0.79871400 | -0.59996700 |
| O                                                                    | -0.21376400 | -1.51097000 | 0.34834600  | O                                                                    | -0.00514900 | -1.39172300 | 0.53773700  |
| H                                                                    | 0.98151700  | 0.90322300  | -0.07152500 | H                                                                    | 1.42490800  | 0.88093300  | -0.31412400 |
| O                                                                    | 1.85952300  | -0.20877300 | -0.00570300 | O                                                                    | 2.15805500  | 0.29578400  | -0.06940600 |
| H                                                                    | 2.30416700  | -0.43079100 | -0.82751500 | H                                                                    | 2.67199300  | 0.16121400  | -0.87008200 |
| O                                                                    | 0.17335000  | 1.60270200  | -0.03428100 | O                                                                    | -0.52071800 | 1.39654400  | 0.22131100  |
| H                                                                    | 0.28900300  | 2.11382400  | 0.77545800  | H                                                                    | -0.32188900 | 1.32773400  | 1.16006900  |
| H                                                                    | 1.05802000  | -0.90117600 | 0.13606100  | H                                                                    | 0.89670900  | -1.03449100 | 0.39998800  |
| <b>CH<sub>2</sub>OO···(H<sub>2</sub>O)<sub>3</sub>-a<sub>1</sub></b> |             |             |             | <b>TS_WT1a<sub>1</sub></b>                                           |             |             |             |
| O                                                                    | 1.80154300  | -1.17635600 | -0.35204700 | O                                                                    | 1.59032900  | -1.10412400 | -0.55295400 |
| O                                                                    | 2.13850900  | 0.11467900  | 0.03229400  | O                                                                    | 1.92442500  | 0.22624100  | -0.07514600 |
| C                                                                    | 1.55962800  | 1.05842500  | -0.54372400 | C                                                                    | 1.07740900  | 1.10276300  | -0.42950200 |
| H                                                                    | 0.84431800  | 0.85762200  | -1.33502700 | H                                                                    | 0.42088000  | 0.88300300  | -1.26072500 |
| H                                                                    | 1.84377700  | 2.04853600  | -0.21222600 | H                                                                    | 1.37021800  | 2.12154000  | -0.21030400 |
| O                                                                    | -0.87890300 | 1.39447900  | 0.63952800  | O                                                                    | -0.42825100 | 1.08768800  | 0.79085200  |
| H                                                                    | -0.77499700 | 0.44375700  | 0.91183600  | H                                                                    | -0.51440700 | -0.02347100 | 0.88959800  |
| O                                                                    | -0.66211300 | -1.25077800 | 0.90417900  | O                                                                    | -0.48997900 | -1.34491500 | 0.79807100  |
| H                                                                    | -1.34991900 | -1.40138500 | 0.23974400  | H                                                                    | -1.23436800 | -1.55852300 | 0.22158500  |
| O                                                                    | -2.77441100 | -0.22390100 | -0.86533400 | O                                                                    | -2.69633200 | 0.01120100  | -0.70582300 |
| H                                                                    | -2.40253600 | 0.57151600  | -0.44717800 | H                                                                    | -2.33922100 | 0.73273200  | -0.17340500 |
| H                                                                    | -0.99141800 | 1.90362600  | 1.44810000  | H                                                                    | -0.12669500 | 1.43428400  | 1.63804800  |
| H                                                                    | 0.19630700  | -1.42706700 | 0.46237900  | H                                                                    | 0.39709600  | -1.38941700 | 0.21465000  |

|                                                                      |             |             |             |                                                                      |             |             |             |
|----------------------------------------------------------------------|-------------|-------------|-------------|----------------------------------------------------------------------|-------------|-------------|-------------|
| H                                                                    | -3.72029700 | -0.21214200 | -0.67424700 | H                                                                    | -3.63948500 | 0.17454800  | -0.78244400 |
| <b>IMF_WT1a<sub>1</sub></b>                                          |             |             |             | <b>CH<sub>2</sub>OO···(H<sub>2</sub>O)<sub>3</sub>-b<sub>1</sub></b> |             |             |             |
| O                                                                    | -0.62333800 | -1.37991600 | 0.67718900  | C                                                                    | -1.71018200 | 1.04519600  | 0.40220700  |
| O                                                                    | -1.50541700 | -0.80299200 | -0.32072300 | H                                                                    | -2.04166300 | 1.93749000  | -0.10959200 |
| C                                                                    | -1.79416800 | 0.50377600  | 0.06047300  | H                                                                    | -1.15616300 | 1.04042700  | 1.33252800  |
| H                                                                    | -1.93317800 | 0.56994400  | 1.13614900  | O                                                                    | -2.01601700 | -0.03423100 | -0.13995000 |
| H                                                                    | -2.71307000 | 0.74512000  | -0.47727000 | O                                                                    | -1.60336500 | -1.20166700 | 0.47514600  |
| O                                                                    | -0.77414100 | 1.44423300  | -0.26274600 | H                                                                    | 0.74333800  | -0.46380500 | -1.19764200 |
| H                                                                    | 2.19646900  | -1.53632100 | -1.22260300 | O                                                                    | 0.87049000  | -1.38843900 | -0.93466000 |
| O                                                                    | 1.93204100  | -1.33615200 | -0.32173400 | H                                                                    | 0.02863100  | -1.60312400 | -0.48833500 |
| H                                                                    | 2.13547700  | -0.39137200 | -0.17020800 | H                                                                    | 1.24748900  | 2.13875400  | -1.18221800 |
| O                                                                    | 1.99898000  | 1.36987700  | 0.23345600  | H                                                                    | 1.51486100  | 1.20090300  | 0.03507900  |
| H                                                                    | 1.02800800  | 1.45080500  | 0.25528700  | O                                                                    | 0.81275500  | 1.54918500  | -0.55704700 |
| H                                                                    | -0.72955200 | 1.52737000  | -1.22114600 | H                                                                    | 2.09039600  | -0.78840200 | 0.31826900  |
| H                                                                    | 0.23923300  | -1.41270900 | 0.20263800  | H                                                                    | 2.59390200  | -0.36851100 | 1.72071500  |
| H                                                                    | 2.31663800  | 1.66410400  | 1.09077800  | O                                                                    | 2.59117400  | -0.09546100 | 0.80125600  |
| <b>TS_WT2b<sub>1</sub></b>                                           |             |             |             | <b>IM_WT3b<sub>1</sub></b>                                           |             |             |             |
| C                                                                    | 1.79401800  | -1.02337800 | 0.32530500  | C                                                                    | -1.97184100 | 0.46934400  | 0.01290800  |
| H                                                                    | 2.02821200  | -1.89942500 | -0.26063000 | H                                                                    | -2.44088300 | 1.12215800  | -0.70822000 |
| H                                                                    | 1.40884400  | -1.05396300 | 1.33525400  | H                                                                    | -1.92412900 | 0.66925600  | 1.07376300  |
| O                                                                    | 1.99746500  | 0.07103300  | -0.23518000 | O                                                                    | -1.55894900 | -0.61669100 | -0.43336300 |
| O                                                                    | 1.70040100  | 1.22776100  | 0.47033000  | O                                                                    | -1.00494400 | -1.50178700 | 0.50487700  |
| H                                                                    | -0.90586300 | 1.05113400  | -1.17494700 | H                                                                    | 2.05978200  | -0.06571100 | -0.07926800 |
| O                                                                    | -1.05698500 | 1.75428200  | -0.51751000 | O                                                                    | -0.18364800 | 2.16339200  | 0.07127100  |
| H                                                                    | -0.18042400 | 1.82911400  | -0.09030900 | H                                                                    | -0.11940800 | 2.80516400  | -0.64118300 |
| H                                                                    | -0.58422500 | -2.10740000 | -1.23962000 | O                                                                    | 1.58423500  | -1.71170400 | -0.11973400 |
| H                                                                    | -1.36718200 | -1.35911400 | -0.13927600 | H                                                                    | 1.71317400  | -2.26370400 | -0.89405200 |
| O                                                                    | -0.46562700 | -1.61042200 | -0.42540700 | H                                                                    | 0.60920600  | -1.71179000 | 0.06943000  |
| H                                                                    | -2.54787300 | 0.57905000  | 0.15349700  | O                                                                    | 2.21913000  | 0.90520400  | 0.00722000  |
| H                                                                    | -3.15591500 | -0.15422800 | 1.37244700  | H                                                                    | 2.79157300  | 1.00963300  | 0.77116400  |
| O                                                                    | -2.85771300 | -0.28576600 | 0.46923700  | H                                                                    | 0.69513900  | 1.71162300  | 0.08875200  |
| <b>TS_WT3b<sub>1</sub></b>                                           |             |             |             | <b>IMF_WT3b<sub>1</sub></b>                                          |             |             |             |
| C                                                                    | 1.80102500  | 0.05504000  | -0.11630000 | C                                                                    | -1.79413400 | 0.50374300  | 0.06038200  |
| H                                                                    | 2.69575900  | 0.34723200  | 0.42390200  | H                                                                    | -2.71311200 | 0.74483900  | -0.47734300 |
| H                                                                    | 1.81910000  | 0.10283000  | -1.19766600 | H                                                                    | -1.93299800 | 0.57040500  | 1.13604800  |
| O                                                                    | 1.20545700  | -0.96003100 | 0.40588900  | O                                                                    | -1.50544700 | -0.80319500 | -0.32027700 |
| O                                                                    | 0.26397600  | -1.53985800 | -0.54954700 | O                                                                    | -0.62302000 | -1.37959500 | 0.67763000  |
| H                                                                    | -1.82071900 | 0.49105800  | 0.04193600  | H                                                                    | 2.13540500  | -0.39122900 | -0.17046400 |
| O                                                                    | 0.91669400  | 1.54668400  | 0.12130100  | O                                                                    | -0.77414100 | 1.44404000  | -0.26338500 |
| H                                                                    | 0.99731400  | 1.77578300  | 1.05493700  | H                                                                    | -0.72954700 | 1.52662500  | -1.22183300 |
| O                                                                    | -2.01459900 | -0.96043500 | 0.23850900  | O                                                                    | 1.93199300  | -1.33597300 | -0.32226400 |
| H                                                                    | -2.23314000 | -1.31410100 | 1.10294000  | H                                                                    | 2.19608100  | -1.53578600 | -1.22331200 |
| H                                                                    | -1.04026500 | -1.28621500 | -0.02643800 | H                                                                    | 0.23938700  | -1.41256400 | 0.20279300  |
| O                                                                    | -1.52359400 | 1.46310100  | -0.16503400 | O                                                                    | 1.99883000  | 1.36985200  | 0.23391100  |
| H                                                                    | -1.85840300 | 1.68180700  | -1.03901700 | H                                                                    | 2.31601300  | 1.66342600  | 1.09163500  |
| H                                                                    | -0.14926800 | 1.47567100  | -0.07174500 | H                                                                    | 1.02785000  | 1.45079600  | 0.25526800  |
| <b>CH<sub>2</sub>OO···(H<sub>2</sub>O)<sub>4</sub>-a<sub>1</sub></b> |             |             |             | <b>TS_WQ1a<sub>1</sub></b>                                           |             |             |             |
| C                                                                    | 1.94372000  | 1.01875400  | -0.66153500 | C                                                                    | 1.68884100  | 1.02796000  | -0.50100000 |
| H                                                                    | 2.32349400  | 2.00020400  | -0.41590800 | H                                                                    | 2.10263900  | 1.99930200  | -0.26513500 |

|                             |             |             |             |                                                                      |             |             |             |
|-----------------------------|-------------|-------------|-------------|----------------------------------------------------------------------|-------------|-------------|-------------|
| H                           | 1.06827800  | 0.83575800  | -1.27020100 | H                                                                    | 0.96496700  | 0.89748300  | -1.29284400 |
| O                           | 2.59640900  | 0.06036400  | -0.20491700 | O                                                                    | 2.40493900  | 0.04790400  | -0.15631900 |
| O                           | 2.14498400  | -1.21822000 | -0.47671300 | O                                                                    | 1.88659700  | -1.22437000 | -0.60808400 |
| H                           | -0.19056500 | 0.48143000  | 1.19773800  | H                                                                    | -0.00134400 | 0.05783200  | 0.98851200  |
| O                           | -0.25527400 | 1.46171200  | 1.00325400  | O                                                                    | 0.14263200  | 1.20676200  | 0.79917200  |
| H                           | -0.34567600 | 1.90690700  | 1.84963600  | H                                                                    | 0.46638200  | 1.60760300  | 1.61266800  |
| H                           | 0.67681800  | -1.37848900 | 0.62941100  | H                                                                    | 0.72931200  | -1.37932700 | 0.35756800  |
| O                           | -2.48759300 | -1.52086900 | -0.32371900 | O                                                                    | -2.51292800 | -1.38331400 | -0.25122100 |
| H                           | -2.61757800 | -0.58912500 | -0.58655300 | H                                                                    | -2.59299300 | -0.42449900 | -0.42319900 |
| H                           | -2.53210500 | -2.03832300 | -1.13128400 | H                                                                    | -2.60230300 | -1.81924200 | -1.10239400 |
| O                           | -0.10478800 | -1.16291300 | 1.17783500  | O                                                                    | -0.05308300 | -1.19336500 | 1.01546500  |
| H                           | -0.88542400 | -1.46394500 | 0.67620800  | H                                                                    | -0.89233200 | -1.44971300 | 0.57726500  |
| O                           | -2.43761000 | 1.25671600  | -0.73851200 | O                                                                    | -2.33962200 | 1.40195900  | -0.47535200 |
| H                           | -1.67463000 | 1.32839700  | -0.12961000 | H                                                                    | -1.52466900 | 1.53352900  | 0.04608900  |
| H                           | -3.13395700 | 1.79034800  | -0.34806000 | H                                                                    | -3.01098500 | 1.96466300  | -0.08182000 |
| <b>IMF_WQ1a<sub>1</sub></b> |             |             |             | <b>CH<sub>2</sub>OO···(H<sub>2</sub>O)<sub>4</sub>-b<sub>1</sub></b> |             |             |             |
| C                           | 2.18161600  | 0.68310600  | 0.08990200  | C                                                                    | -1.18437600 | -0.75780000 | -1.12448400 |
| H                           | 3.07247900  | 0.91996700  | 0.67570800  | H                                                                    | -0.98001900 | -1.73161400 | -1.54691200 |
| H                           | 2.25897100  | 1.06313900  | -0.92581600 | H                                                                    | -0.53493100 | 0.10516900  | -1.22779700 |
| O                           | 2.12525400  | -0.70451500 | 0.10783200  | O                                                                    | -2.25373700 | -0.67611300 | -0.48727900 |
| O                           | 1.23640100  | -1.13304500 | -0.95651800 | O                                                                    | -2.57880600 | 0.52970100  | 0.10353900  |
| H                           | -1.02497600 | -2.52171800 | 1.12930500  | H                                                                    | 0.69021100  | 1.58415600  | 0.13765100  |
| O                           | 1.03486900  | 1.31277100  | 0.65384000  | O                                                                    | 0.79220800  | -1.55634700 | 0.89653300  |
| H                           | 0.91555900  | 0.97618500  | 1.54858300  | H                                                                    | 0.94635000  | -2.36609400 | 1.38891300  |
| H                           | 0.45926800  | -1.46459400 | -0.44832100 | H                                                                    | 0.08061800  | 0.18545300  | 1.60946800  |
| O                           | -3.02137300 | -0.18550200 | 0.18788400  | O                                                                    | 1.20570500  | 1.63874600  | -0.71067500 |
| H                           | -2.54020800 | 0.62740500  | -0.07624300 | H                                                                    | 2.46397000  | 0.37785900  | -0.61792100 |
| H                           | -3.64585700 | -0.36403700 | -0.51992700 | H                                                                    | 1.33416700  | 2.56928600  | -0.90741700 |
| O                           | -1.01507700 | -2.05759900 | 0.28964700  | O                                                                    | -0.23409600 | 1.09178700  | 1.46629800  |
| H                           | -1.77074900 | -1.43063500 | 0.29893800  | H                                                                    | -1.14244800 | 0.98451800  | 1.10664300  |
| O                           | -1.44153900 | 1.95608700  | -0.50981400 | O                                                                    | 2.92375600  | -0.47664600 | -0.47127200 |
| H                           | -0.54705400 | 1.73620800  | -0.18781700 | H                                                                    | 1.64611300  | -1.30855800 | 0.48191200  |
| H                           | -1.61540900 | 2.85387500  | -0.21678300 | H                                                                    | 3.76197900  | -0.26240400 | -0.05478300 |
| <b>TS_WQ2b<sub>1</sub></b>  |             |             |             | <b>IM_WQ3b<sub>1</sub></b>                                           |             |             |             |
| C                           | -2.21863200 | 1.09279200  | 0.36722100  | C                                                                    | -2.47031635 | -0.47405358 | -0.03855765 |
| H                           | -2.34345900 | 2.01422800  | -0.18956200 | H                                                                    | -3.03684267 | -0.08605858 | -0.87180112 |
| H                           | -1.87395900 | 1.03326100  | 1.41081900  | H                                                                    | -2.83407448 | -0.51327857 | 0.97772366  |
| O                           | -2.48713200 | 0.04813900  | -0.28368000 | O                                                                    | -1.37428013 | -0.98868845 | -0.32685491 |
| O                           | -2.31680800 | -1.15768300 | 0.39257600  | O                                                                    | -0.65042436 | -1.53399683 | 0.73976902  |
| H                           | 1.76355900  | -1.78383500 | -0.14718700 | H                                                                    | 2.43983700  | -0.43766700 | -0.20586300 |
| O                           | 0.10364300  | 1.88692500  | -0.24719000 | O                                                                    | -1.69360700 | 1.86748500  | -0.30479700 |
| H                           | 0.02504800  | 2.24898700  | -1.14068400 | H                                                                    | -1.76432500 | 2.32125600  | -1.14885800 |
| H                           | 0.24261700  | -1.22324500 | -1.15228700 | H                                                                    | 0.79529700  | -1.89613200 | 0.09290600  |
| O                           | 2.60218200  | -1.53613700 | 0.31145900  | O                                                                    | 2.79000500  | 0.48534700  | -0.17042600 |
| H                           | 2.84153600  | 0.45383700  | 0.26584500  | H                                                                    | 1.56371900  | 1.65270900  | 0.18677600  |
| H                           | 3.32741500  | -1.77720800 | -0.29131700 | H                                                                    | 3.25841200  | 0.62272700  | -0.99712000 |
| O                           | 0.06389000  | -1.83107100 | -0.41346200 | O                                                                    | 1.70881900  | -1.98844800 | -0.29153600 |
| H                           | -0.83498100 | -1.54615100 | -0.09869400 | H                                                                    | 2.12498800  | -2.71273000 | 0.18138300  |
| O                           | 2.79583600  | 1.40309400  | 0.04049200  | O                                                                    | 0.88352700  | 2.33594500  | 0.39489400  |

|                            |             |             |             |                             |             |             |             |
|----------------------------|-------------|-------------|-------------|-----------------------------|-------------|-------------|-------------|
| H                          | 1.05449800  | 1.64073000  | -0.11160600 | H                           | -0.75565000 | 1.99584900  | -0.02313400 |
| H                          | 3.13630615  | 1.44841432  | -0.85943195 | H                           | 1.12012482  | 3.08220542  | -0.16094464 |
| <b>TS_WQ3b<sub>1</sub></b> |             |             |             | <b>IMF_WQ3b<sub>1</sub></b> |             |             |             |
| C                          | -2.18257900 | -0.25945100 | 0.17606300  | C                           | -2.01420400 | 0.62072600  | -0.45572900 |
| H                          | -3.12913800 | -0.20328000 | -0.36246900 | H                           | -2.83836700 | 0.55380100  | -1.17088100 |
| H                          | -2.27146200 | -0.31118800 | 1.26316900  | H                           | -2.12094500 | 1.50000700  | 0.17992900  |
| O                          | -1.39458900 | -1.19309900 | -0.35548900 | O                           | -2.13832600 | -0.56337800 | 0.27620700  |
| O                          | -0.35669500 | -1.45395400 | 0.65567000  | O                           | -1.15884900 | -0.54377900 | 1.34808900  |
| H                          | 2.16758100  | -0.53163400 | -0.14191700 | H                           | 1.61357500  | -1.32891600 | -0.32837100 |
| O                          | -1.65732400 | 1.24233900  | -0.19860100 | O                           | -0.76725200 | 0.74381900  | -1.11280100 |
| H                          | -1.91771900 | 1.33410100  | -1.13437400 | H                           | -0.46125600 | -0.14513900 | -1.35312200 |
| H                          | 0.62647700  | -1.59016800 | 0.09140500  | H                           | -0.43344500 | -1.04149900 | 0.91709700  |
| O                          | 2.51588000  | 0.58590300  | 0.24590500  | O                           | 2.99573700  | -0.32118600 | 0.04645600  |
| H                          | 1.37171300  | 1.46763500  | 0.04508600  | H                           | 2.52288900  | 0.52612800  | 0.20807600  |
| H                          | 3.05547700  | 0.85926200  | -0.51206700 | H                           | 3.68190200  | -0.13042300 | -0.59751400 |
| O                          | 1.76109300  | -1.54664300 | -0.47121000 | O                           | 0.70394600  | -1.68520500 | -0.45324200 |
| H                          | 2.22713200  | -2.23722400 | 0.04271000  | H                           | 0.78325800  | -2.63590800 | -0.56279900 |
| O                          | 0.50397800  | 2.15371400  | -0.00032500 | O                           | 1.33380400  | 1.81968000  | 0.42213300  |
| H                          | -0.61722300 | 1.68600800  | -0.07905200 | H                           | 0.56611300  | 1.51477500  | -0.10235800 |
| H                          | 0.61877414  | 2.65115586  | -0.81392459 | H                           | 1.70594426  | 2.53756291  | -0.09806395 |
